# Supplementary material for: Unveiling the Multilocus Sequence Typing (MLST) Schemes and Core Genome Phylogenies for Genotyping Chlamydia trachomatis
Source: PubMed Central journal article supplement (PMC6113918; doi:10.3389/fmicb.2018.01854), 2018-08-22
Supplement: Data_Sheet_1.pdf [file Data_Sheet_1.pdf]

## *Supplementary Material*

# **Unveiling the Multilocus Sequence Typing (MLST) schemes and Core Genome phylogenies for genotyping *Chlamydia trachomatis***

Luz Helena Patiño<sup>1,2†</sup>, Milena Camargo<sup>2,3†</sup>, Marina Muñoz<sup>1†</sup>, Dora Inés Ríos-Chaparro<sup>1</sup>, Manuel Alfonso Patarroyo<sup>3,4</sup>, Juan David Ramírez<sup>1\*</sup>

<sup>1</sup> Universidad del Rosario, Facultad de Ciencias Naturales y Matemáticas, Programa de Biología, Grupo de Investigaciones Microbiológicas UR (GIMUR), Bogotá, Colombia

<sup>2</sup> PhD Programme in Biomedical and Biological Sciences, Universidad del Rosario, Bogotá, Colombia.

<sup>3</sup> Molecular Biology and Immunology Department, Fundación Instituto de Immunología de Colombia (FIDIC), Bogotá, Colombia

<sup>4</sup> Universidad del Rosario, School of Medicine and Health Sciences, Bogotá, Colombia

† The three authors contributed equally as first author

\* Corresponding author: Juan David Ramírez BSc, MSc, Dr.Sc.  
Address: Carrera 24 # 63C - 69, Bogotá, Colombia  
Telephone number: +57-1-297 0200 Ext: 4033  
E-mail: [juand.ramirez@urosario.edu.co](mailto:juand.ramirez@urosario.edu.co)

## **Supplementary Material**

### **Summary**

The supplementary material includes 6 figures and 6 tables.

## Supplementary information legends

**Supplementary Table S1.** Description of Scheme A (*Chlamydiales-Ct*), Scheme B (*C. trachomatis*) and Scheme C (*C. trachomatis* Uppsala) marker location and function analysed here.

**Supplementary Figure S1.** Ct variant distribution by country.

**Supplementary Table S2.** Descriptive patterns of interest for Ct.

**Supplementary Figure S2.** Variant frequency by age group; green shows cluster 1 variants (associated with ocular infections), red shows cluster 2 variants (associated with urogenital infections) and blue cluster 3 variants (associated with Lymphogranuloma venereum). **A.** Isolated from 16 to 29 years-old (n=534) **B.** Isolated from people aged over 29 years-old (n=26).

**Supplementary Figure S3.** Amount of STs assigned by each MLST scheme and regarding *C. trachomatis* variants for 3,241 isolates.

**Supplementary Table S3.** ST distribution frequency regarding to MLST scheme *C. trachomatis* variant (others include STs having less than 2.0% prevalence).

**Supplementary Figure S4.** Characteristics of the markers used in the MLST schemes analysed here. **A.** Percentage allele identity per marker. **B.** The number of variant sites per marker compared to the number of informative sites according to parsimony.

**Supplementary Table S4.** Diversity indexes for the markers in the MLST schemes analysed here. **A.** Scheme A (*Chlamydiales-Ct*). **B.** Scheme B (*C. trachomatis*). **C.** Scheme C (*C. trachomatis* Uppsala). **D.** Scheme D (Plasmid loci).

**Supplementary Table S5.** Description of the STs and clone complexes for the structure observed in the eBURST diagram, according to the scheme being analysed.

**Supplementary Figure S5.** Concatenated sequence phylogenetic networks for each MLST scheme analysed, based on the Neighbor-net algorithm.

**Supplementary Figure S6.** Phylogenetic reconstruction based on 16SrRNA from whole genome dataset.

**Supplementary Table S6.** Analysis of scheme optimisation and optimum number of loci for the 8 molecular markers selected here.

## Supplementary Table S1.

| Scheme               | Locus       | Name                                     | Gene start/Stop                                   | Gene length | Function                                                                                                                                                            |
|----------------------|-------------|------------------------------------------|---------------------------------------------------|-------------|---------------------------------------------------------------------------------------------------------------------------------------------------------------------|
| Chlamydiales-Ct      | <i>gatA</i> | glutamyl-tRNA amidotransferase subunit A | 2108-3580*/<br>2759-3183 <sup>1</sup>             | 1473        | Allows the formation of correctly charged Gln-tRNA(Gln) through the transamidation of misacylated Glu-tRNA(Gln) in organisms which lack glutaminyl-tRNA synthetase. |
|                      | <i>oppA</i> | Oligopeptide Binding Protein             | 157100-155823*/<br>224745-225217 <sup>1</sup>     | 1278        | Transport and binding; amino acids, peptides and amines                                                                                                             |
|                      | <i>hflX</i> | GTP-binding protein                      | 433641-432301*/<br>435569-435135 <sup>1</sup>     | 1341        | GTPase that associates with the 50S ribosomal subunit and may have a role during protein synthesis or ribosome biogenesis.                                          |
|                      | <i>gidA</i> | tRNA (racil-5-)-methyltransferase        | 576941-578770*/<br>580102-580575 <sup>1</sup>     | 1830        | NAD-binding protein involved in the addition of a carboxymethylaminomethyl (cmm) group at the wobble position (U34) of certain tRNAs, forming tRNA-cmm5s2U34.       |
|                      | <i>enoA</i> | Enolase                                  | 661850-663121*/<br>665021-66540 <sup>1</sup>      | 1272        | Catalyzes the reversible conversion of 2-phosphoglycerate into phosphoenolpyruvate. It is essential for the degradation of carbohydrates via glycolysis.            |
|                      | <i>hemN</i> | Coproporphyrinogen-III oxidase           | 60110-58977*/<br>871011-870580 <sup>1</sup>       | 1134        | Is involved in step 1 of the subpathway that synthesizes protoporphyrinogen-IX from coproporphyrinogen-III (AdoMet route).                                          |
|                      | <i>fumC</i> | Fumarate hydratase                       | 1004550-1005938*/<br>1007488-1007952 <sup>1</sup> | 1389        | Catalyzes the reversible addition of water to fumarate to give L-malate.                                                                                            |
| <i>C.trachomatis</i> | <i>glyA</i> | Serine hydroxymethyltransferase          | 502443/500953                                     | 1491        | Catalyzes the reversible interconversion of serine and glycine with tetrahydrofolate (THF) serving as the one-carbon carrier.                                       |
|                      | <i>mdhC</i> | malate dehydrogenase                     | 430162/429185                                     | 978         | Catalyzes the reversible oxidation of malate to oxaloacetate.                                                                                                       |
|                      | <i>pdhA</i> | pyruvate dehydrogenase                   | 273563/274582                                     | 1020        | Catalyzes the overall conversion of pyruvate to acetyl-CoA and CO <sub>2</sub> .                                                                                    |

|             |             |                                     |               |      |                                                                                                                                                  |
|-------------|-------------|-------------------------------------|---------------|------|--------------------------------------------------------------------------------------------------------------------------------------------------|
|             | <i>yhbG</i> | ABC transporter ATP binding protein | 751062/750346 | 717  | Transport and binding. Membrane Transport; ATP-binding cassette (ABC) transport system.                                                          |
|             | <i>pykF</i> | pyruvate kinase                     | 374217/375671 | 1455 | This protein is involved in step <b>5</b> of the subpathway that synthesizes pyruvate from D-glyceraldehyde 3-phosphate                          |
|             | <i>lysS</i> | lysyl-tRNA synthetase               | 916214/917791 | 1578 | Translation; aminoacyl-tRNA synthetases. Amino Acid Metabolism; Lysine biosynthesis<br>Metabolism of Macromolecules; Aminoacyl-tRNA biosynthesis |
|             | <i>leuS</i> | leucyl-tRNA synthetase              | 238225/235769 | 2457 | Translation; aminoacyl-tRNA synthetase. Metabolism of Macromolecules; Aminoacyl-tRNA biosynthesis                                                |
| C.t Uppsala | <i>hctB</i> | Histone H1-like protein HC2         | 51504/52112   | 609  | Might have a role in establishing the nucleoid structure of elementary bodies.                                                                   |
|             | <i>pbpB</i> | Penicillin binding protein          | 780668/783907 | 3240 | Code for a penicillin-binding protein                                                                                                            |
|             | CT058       |                                     |               |      | Putative uncharacterized protein                                                                                                                 |
|             | CT144       |                                     |               |      | Putative uncharacterized protein                                                                                                                 |
|             | CT172       |                                     |               |      | Putative uncharacterized protein                                                                                                                 |

\*Position in genome of Ct A/ HAR-13. Pannekoek, Y. et al. Multi locus sequence typing of Chlamydiales: clonal groupings within the obligate intracellular bacteria Chlamydia trachomatis. BMC microbiology 8, 42, doi:10.1186/1471-2180-8-42 (2008).

<sup>1</sup>Pannekoek Y, et al., Multi locus sequence typing of Chlamydia reveals an association between Chlamydia psittaci genotypes and host species. PLoS One 5, 12:e14179, doi: 10.1371/journal.pone.0014179.2010 (2010)

# Supplementary Figure S1.

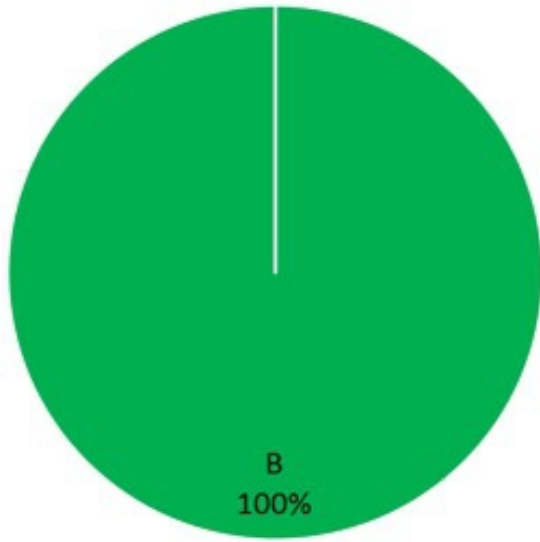

**Gambia (n= 1)**

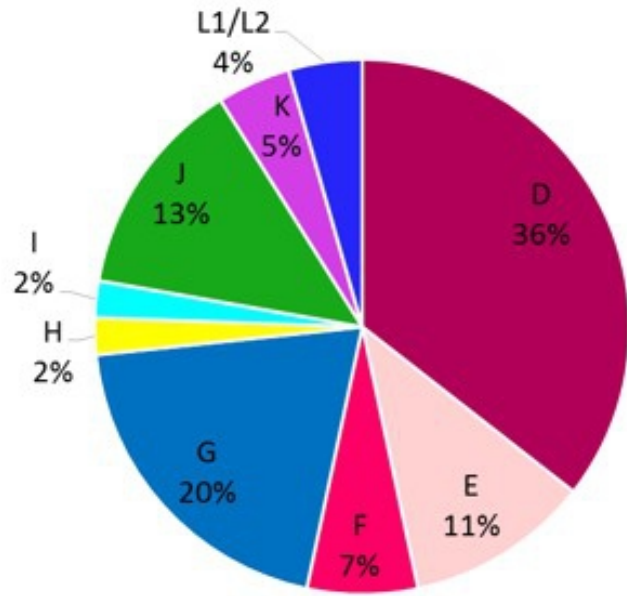

**South Africa (n= 45)**

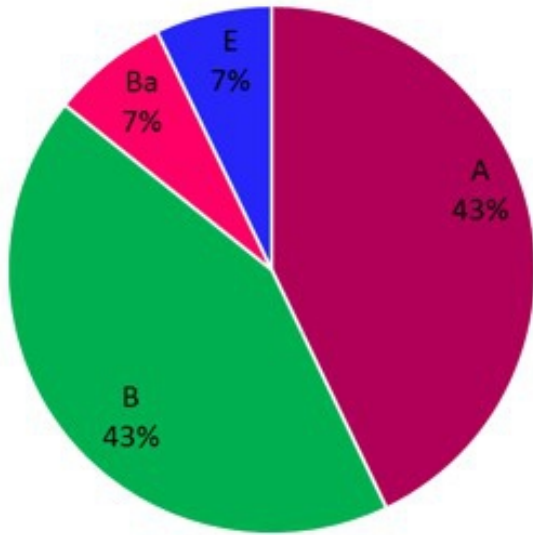

**Tanzania (n= 14)**

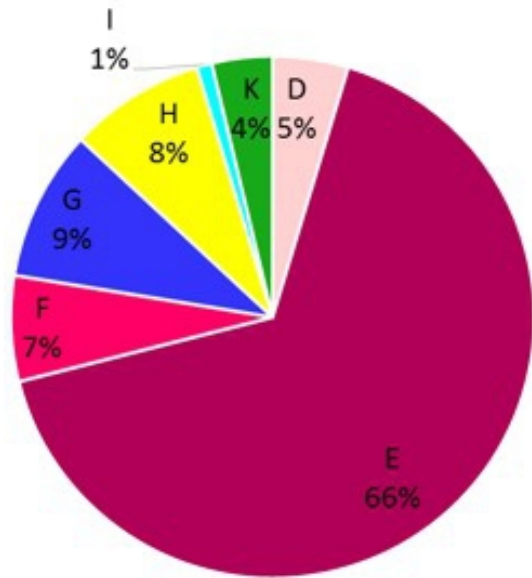

**Tunisia (n= 107)**

**Africa**

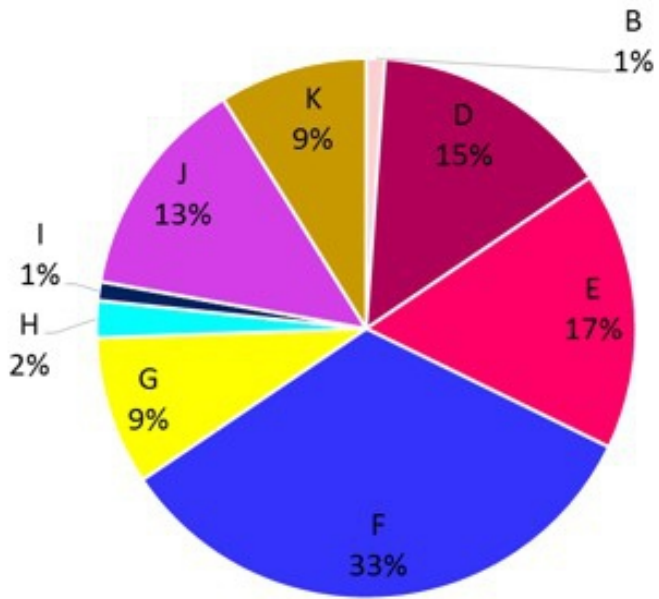

**China** (n= 90)

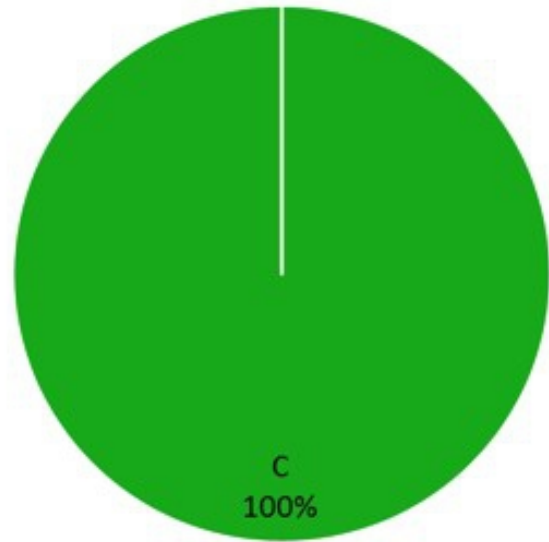

**Nepal** (n= 10)

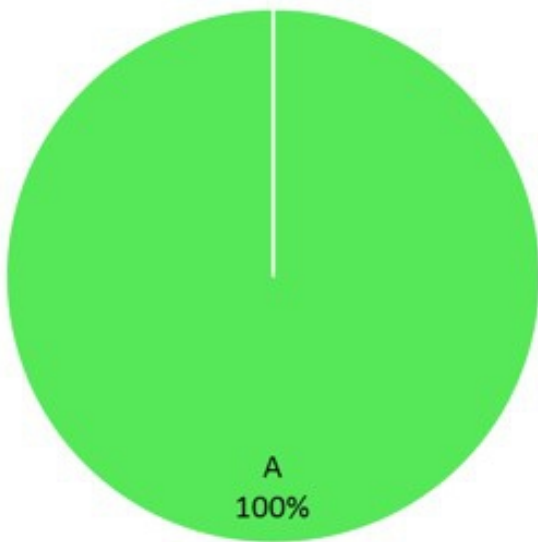

**Saudi Arabia** (n= 2)

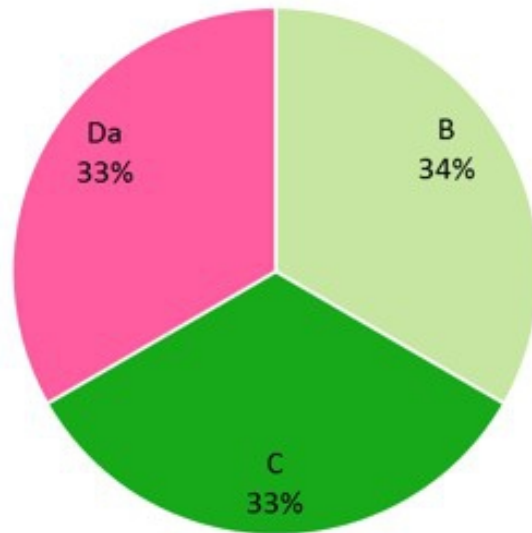

**Taiwan** (n= 3)

# Asia

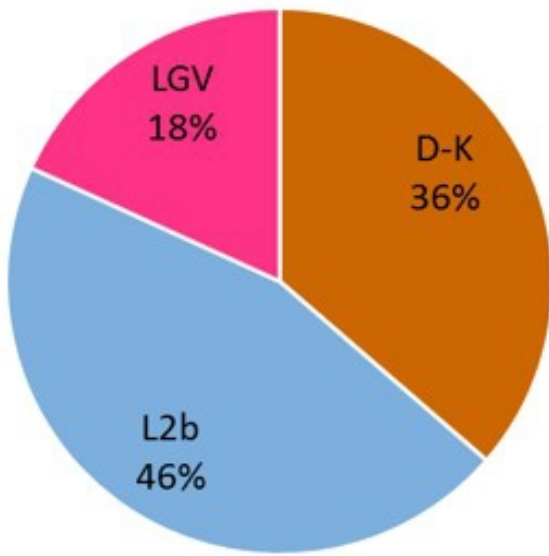

**Denmark (n= 11)**

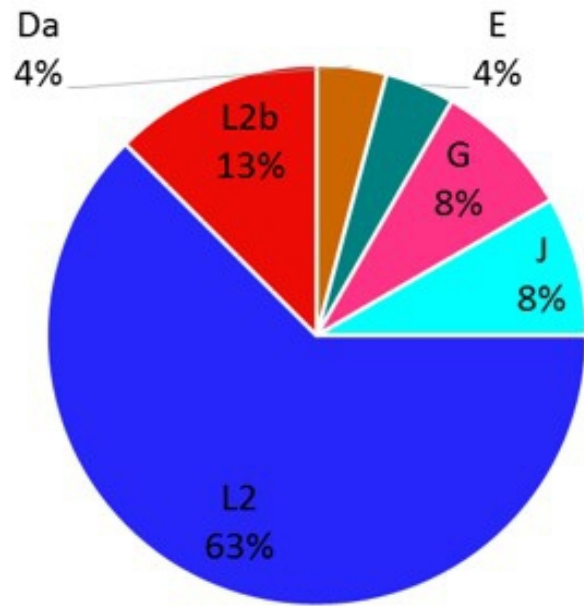

**France (n= 24)**

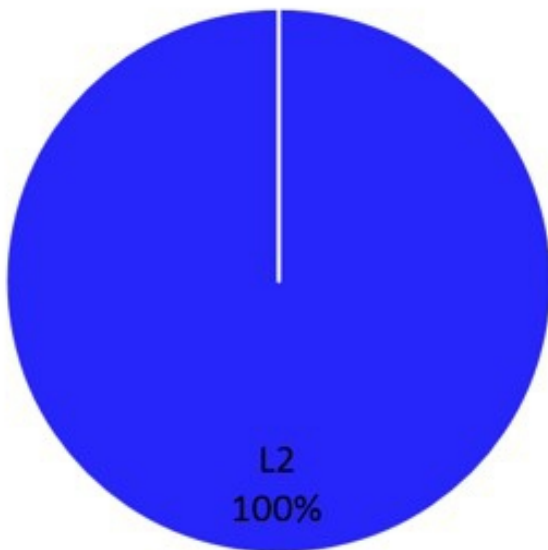

**Germany (n= 1)**

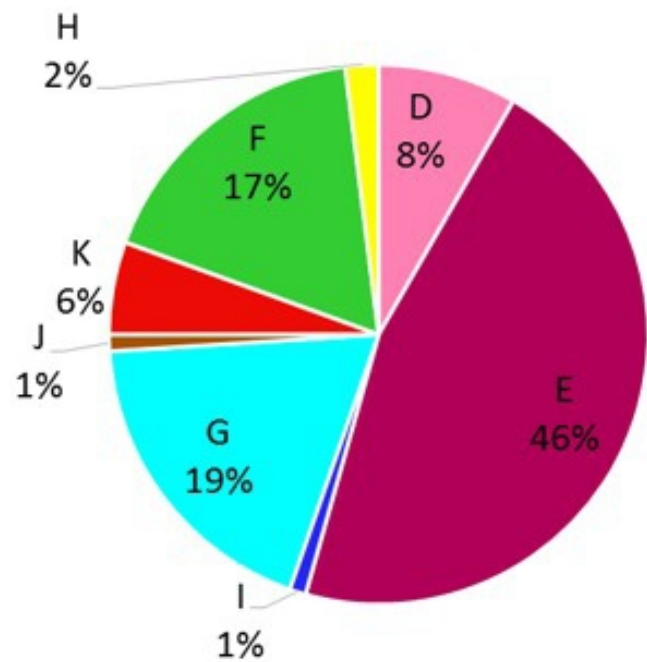

**Norway (n= 249)**

# Europe



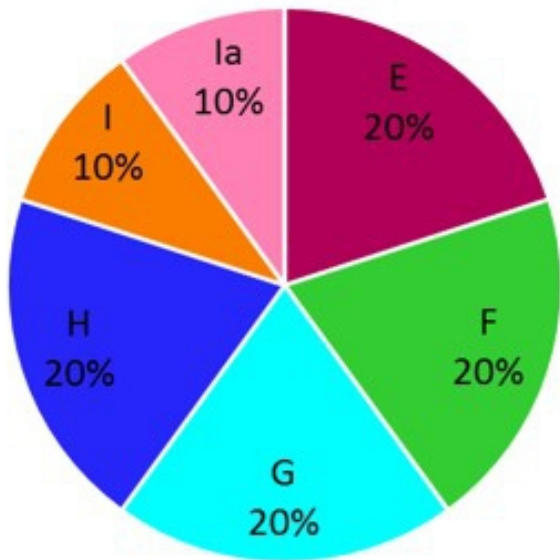

**Portugal (n= 10)**

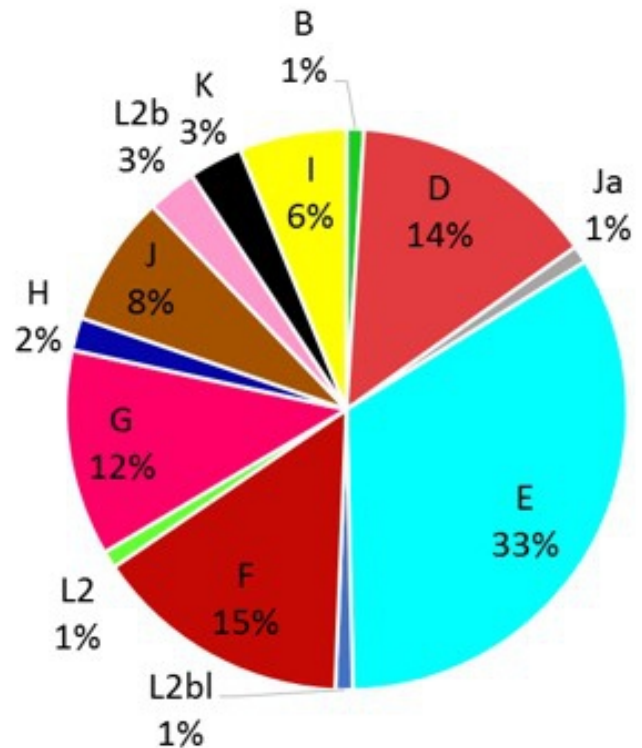

**Netherlands (n= 1793)**

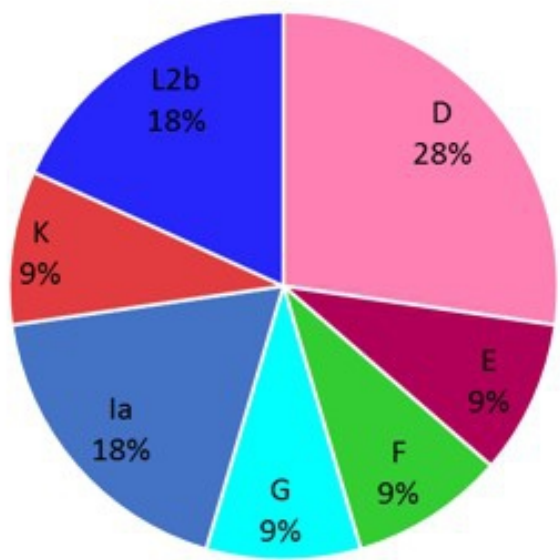

**United Kingdom (n= 11)**

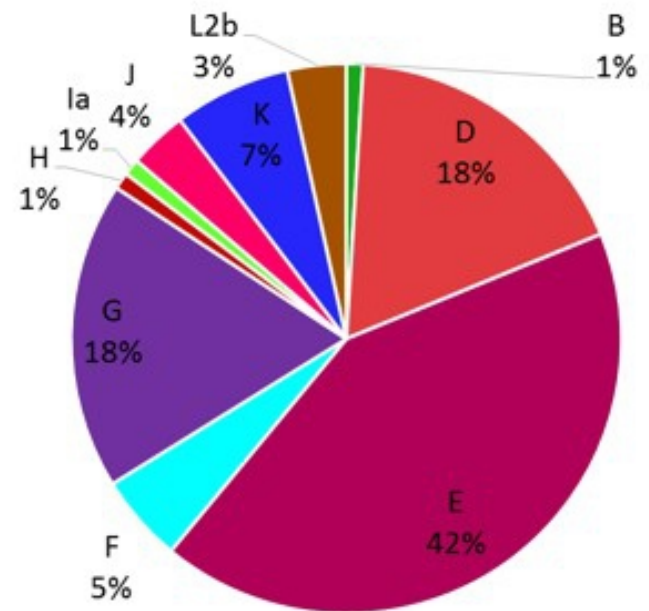

**Sweden (n= 342)**

# Europe



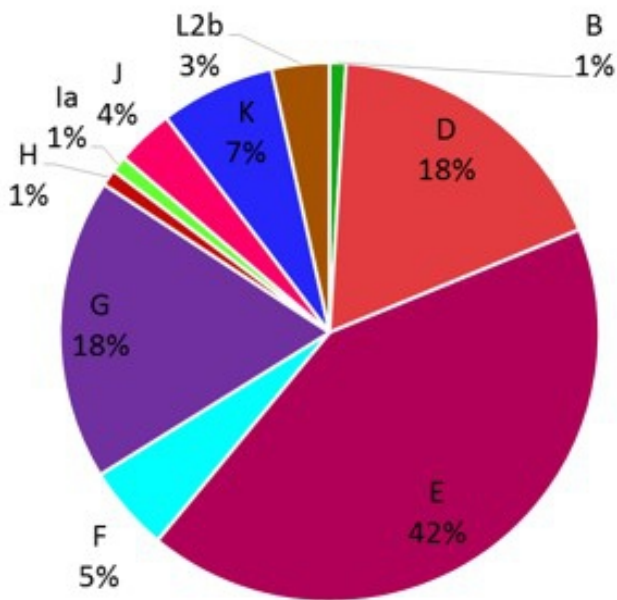

Sweden (n= 342)

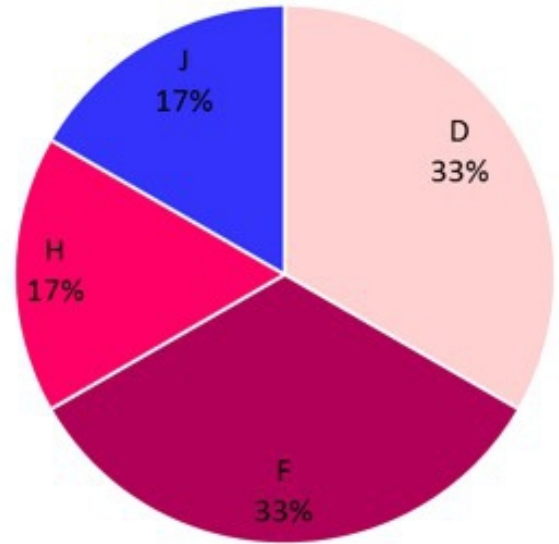

Australia (n= 6)

# Europe

# Oceania

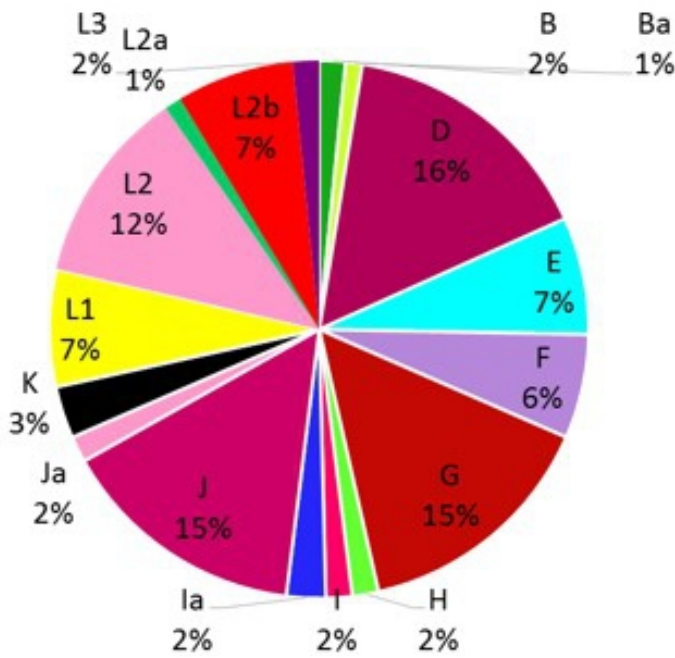

United States (n= 127)

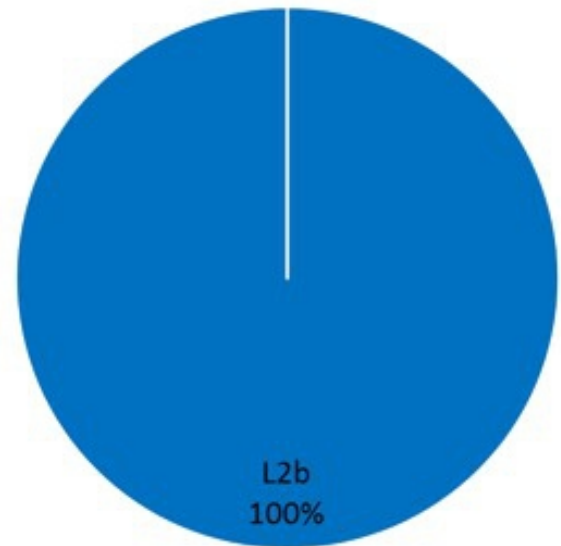

Canada (n= 2)

# North America

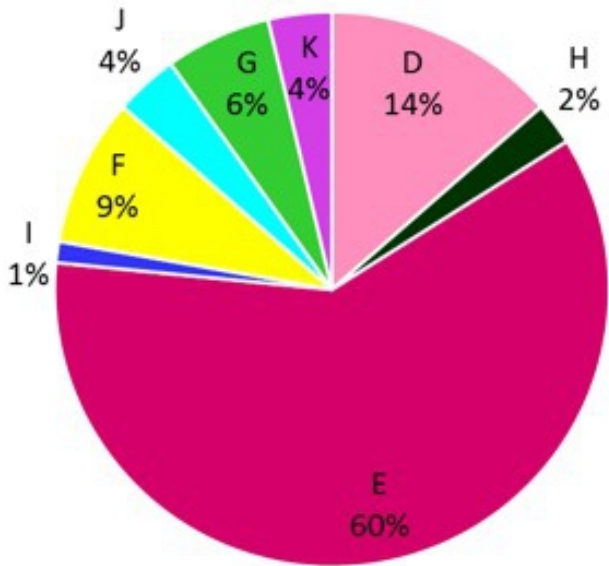

**Argentina (n= 81)**

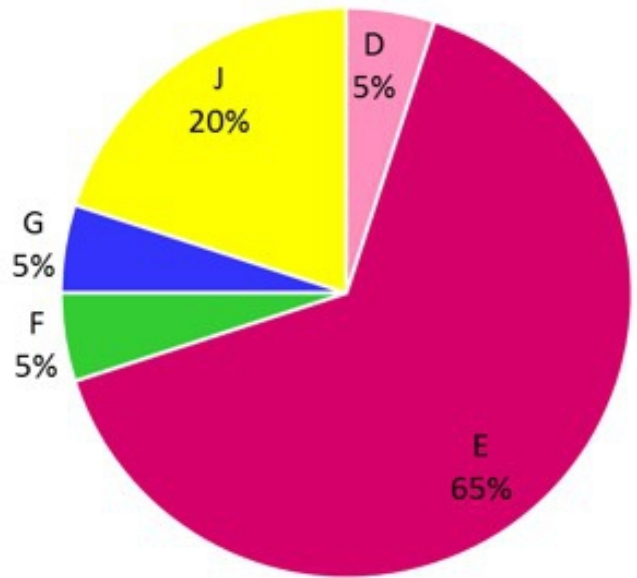

**Chile (n= 20)**

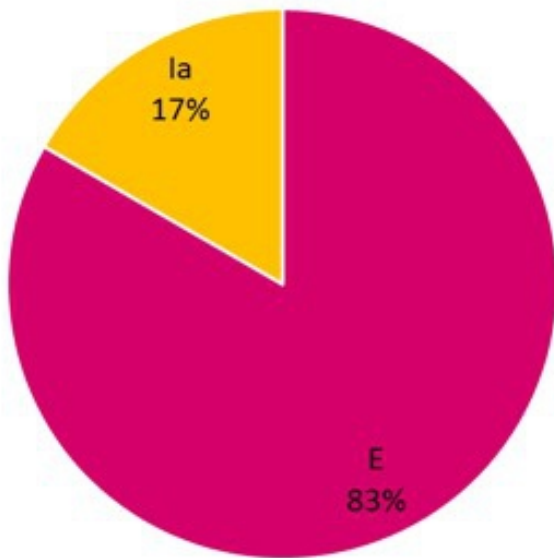

**Ecuador (n= 6)**

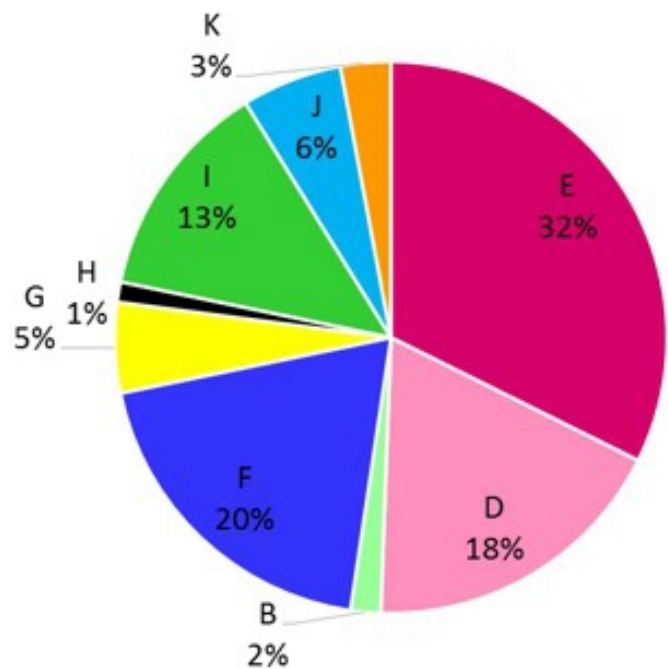

**Suriname (n= 170)**

# South America

## Supplementary Table S2.

| Characteristic                                                      | Number of DS isolates with information | Description                                                                                                                                                                                                                                                                                                                                                                                                                 |
|---------------------------------------------------------------------|----------------------------------------|-----------------------------------------------------------------------------------------------------------------------------------------------------------------------------------------------------------------------------------------------------------------------------------------------------------------------------------------------------------------------------------------------------------------------------|
| Gender                                                              | 3,129                                  | 50.3% (48.5-52.1 95%CI) of the samples in the database corresponded to men.                                                                                                                                                                                                                                                                                                                                                 |
| Sample source<br>( <a href="#">Fig 3C</a> )                         | 2,194                                  | The samples with the highest and lowest number of reports were genitourinary tract and pharynx, respectively. Cluster 1 (Variant B) was obtained exclusively from the genitourinary tract. Cluster 3 (Variants L2 and L2b) was obtained from the anal region                                                                                                                                                                |
| <i>Ct</i> distribution<br>( <a href="#">Fig 3B</a> )                | 3,133                                  | 57.2% de <i>Ct</i> were reported in the Netherlands                                                                                                                                                                                                                                                                                                                                                                         |
| Cluster distribution<br>( <a href="#">Supplementary Figure S1</a> ) | 3,225                                  | Variants included in Cluster 2 had the highest frequency regarding all regions evaluated<br>Variants included in Cluster 1 was more prevalent in Asia<br>Variants included in Cluster 3 was more prevalent in North America                                                                                                                                                                                                 |
| Variant distribution<br>( <a href="#">Fig 3A</a> )                  | 3,692                                  | The cluster having the highest report frequency was the Cluster 2: Urogenital infections (D-K, Da, Ga, Ia and Ja) (91.3%: 90.2-92.2 95%CI).<br>Variant E (33.7%: 32.1-35.4 95%CI)<br>Variant D (14.2%: 13.0-15.4 95%CI)<br>Variant F (13.6%: 12.4-14.8 95%CI)<br>Variant G (12.5%: 11.4-13.7 95%CI)                                                                                                                         |
| Age<br>( <a href="#">Supplementary Figure S2</a> )                  | 567                                    | 7 isolates obtained from children aged less than 12 years-old (1.2%: 0.04-0.25 95%CI)<br>534 isolates from people aged 16-29 years-old (94.2%: 91.9-95.9 95%CI)<br>26 isolates from adults over 29 years of age (4.6%: 3.0-6.6 95%CI)<br>Only the Variant C (Cluster 1) was reported in this group<br>The Variants E (37.2%: 33.0-41.4 95%CI) and D (34.6%: 17.2-55.6 95%CI) (Cluster 2) were identified in this categories |

# Supplementary Figure S2.

## 16 - 29 years-old

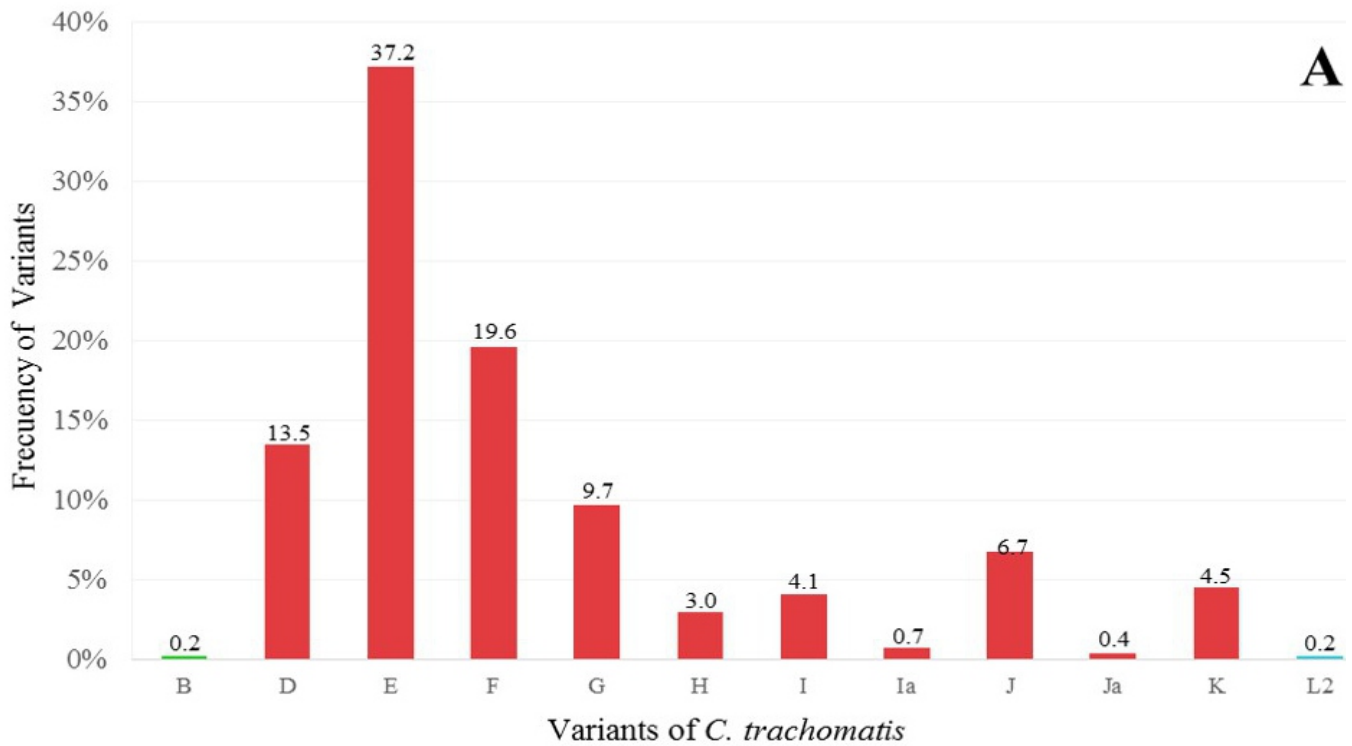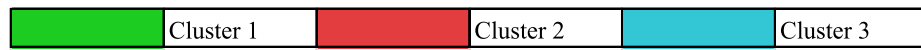

## > 29 years-old

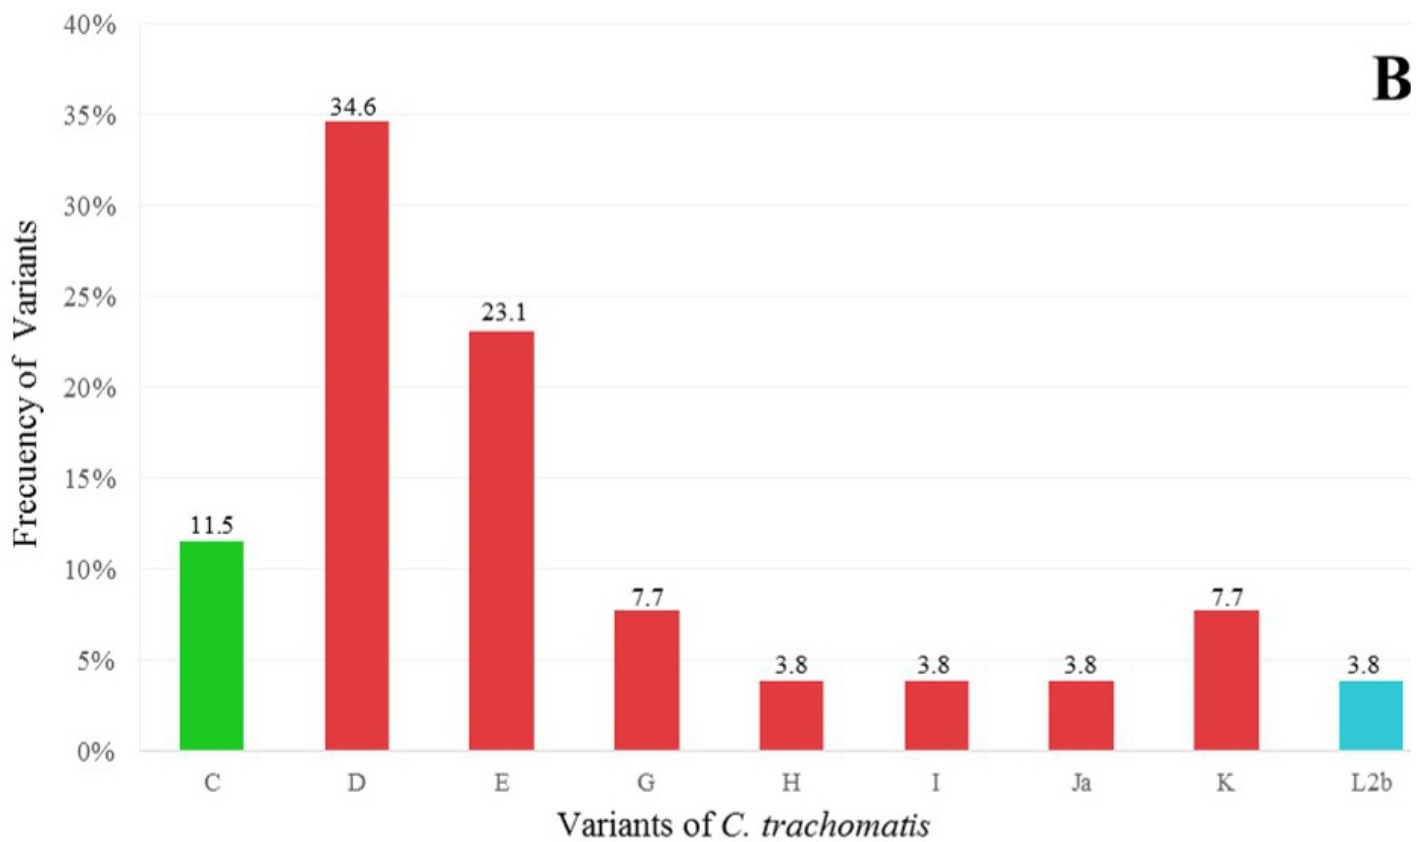

# Supplementary Figure S3.

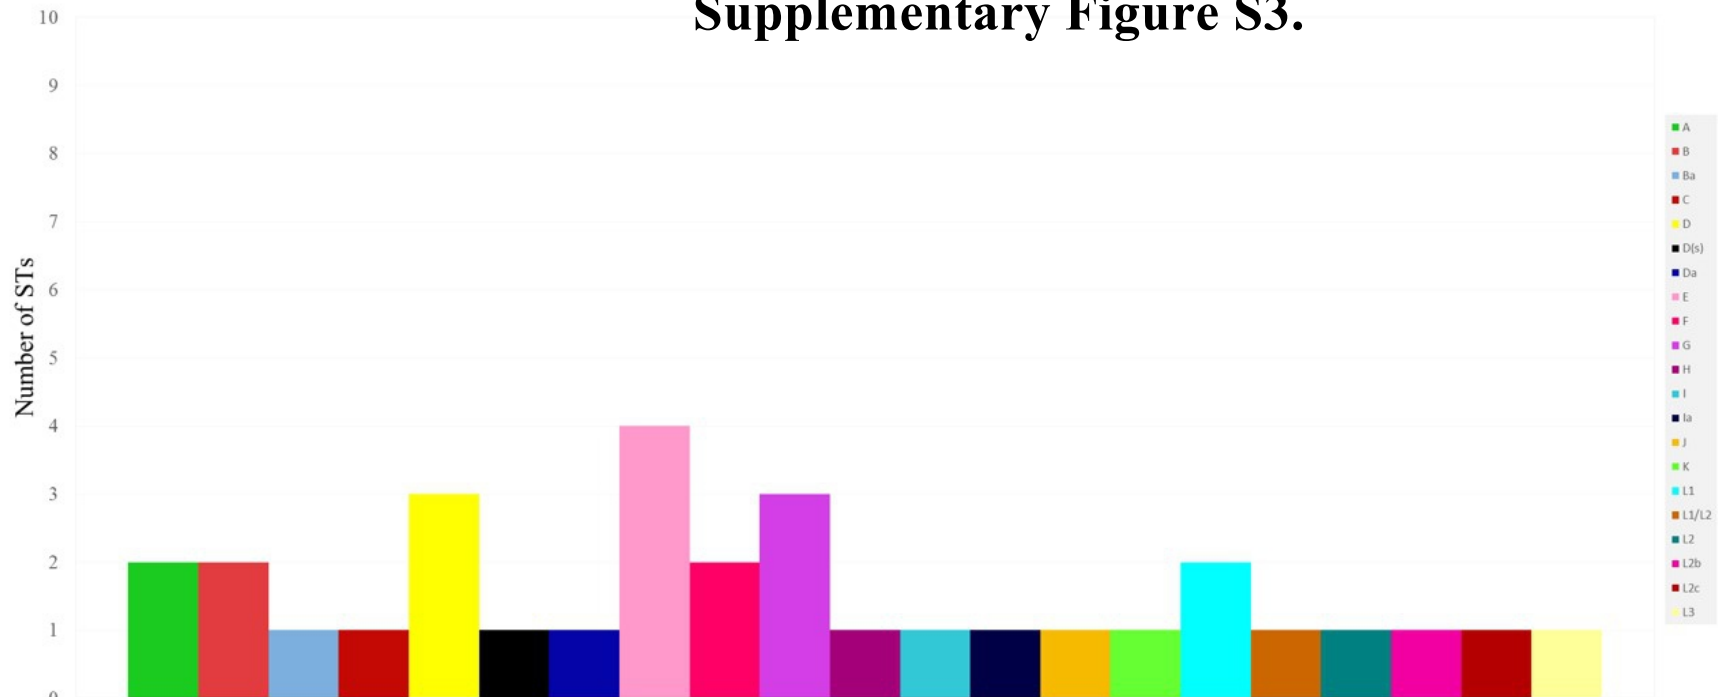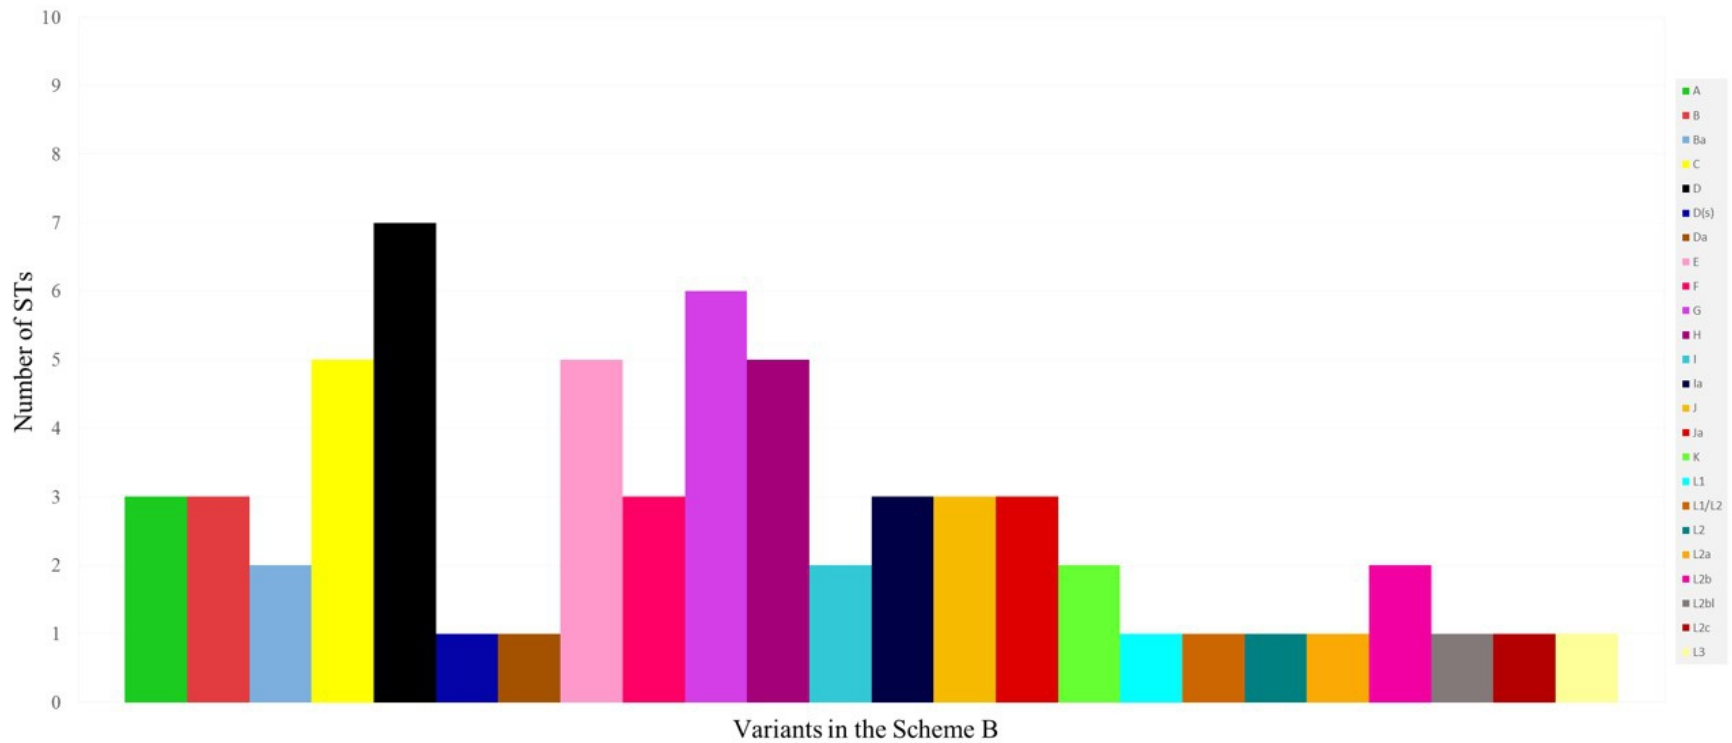

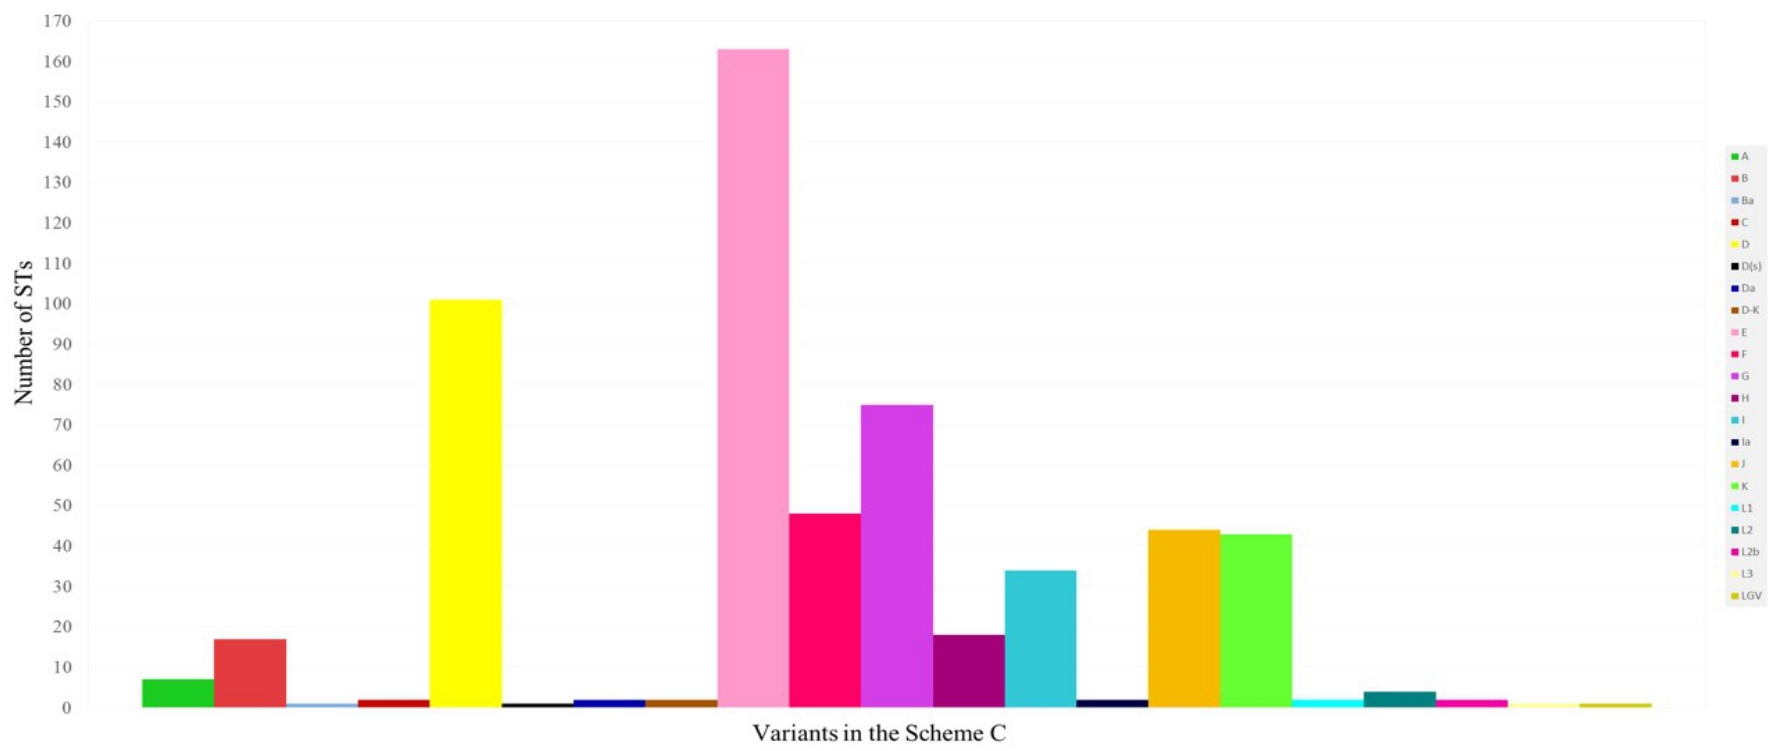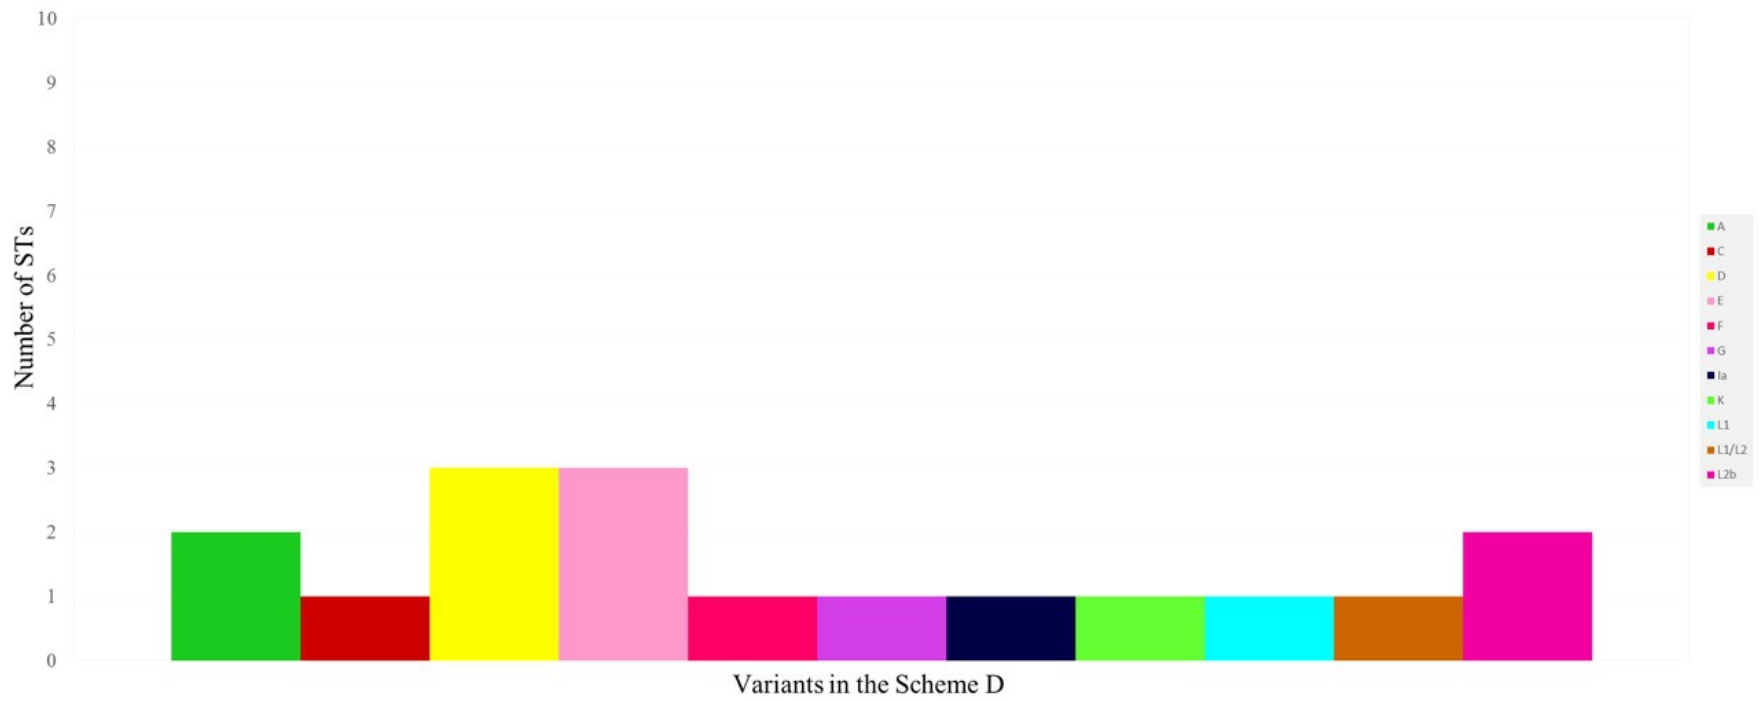

### Supplementary Table S3.

| MLST             | Scheme A  |             |      | Scheme B  |             |      | Scheme C  |             |      | Scheme D  |             |      |
|------------------|-----------|-------------|------|-----------|-------------|------|-----------|-------------|------|-----------|-------------|------|
|                  | <i>ST</i> | Isolate (n) | %    | <i>ST</i> | Isolate (n) | %    | <i>ST</i> | Isolate (n) | %    | <i>ST</i> | Isolate (n) | %    |
| Variant <b>A</b> | 3         | 6           | 85.7 | 4         | 7           | 77.8 | 119       | 28          | 43.1 | 4         | 4           | 80.0 |
| n= 75            | 1         | 1           | 14.3 | 12        | 1           | 11.1 | 115       | 20          | 30.8 | 1         | 1           | 20.0 |
|                  |           |             |      | 22        | 1           | 11.1 | 47        | 8           | 12.3 |           |             |      |
|                  |           |             |      |           |             |      | 118       | 6           | 9.2  |           |             |      |
|                  |           |             |      |           |             |      | Others    | 3           | 4.6  |           |             |      |
| <b>Total</b>     | <b>2</b>  | <b>7</b>    |      | <b>3</b>  | <b>9</b>    |      | <b>7</b>  | <b>65</b>   |      | <b>2</b>  | <b>5</b>    |      |

| MLST             | Scheme A  |             |      | Scheme B  |             |      | Scheme C  |             |      | Scheme D  |             |   |
|------------------|-----------|-------------|------|-----------|-------------|------|-----------|-------------|------|-----------|-------------|---|
|                  | <i>ST</i> | Isolate (n) | %    | <i>ST</i> | Isolate (n) | %    | <i>ST</i> | Isolate (n) | %    | <i>ST</i> | Isolate (n) | % |
| Variant <b>B</b> | 3         | 1           | 50.0 | 12        | 5           | 71.4 | 118       | 4           | 13.3 |           |             |   |
| n= 38            | 45        | 1           | 50.0 | 6         | 1           | 14.3 | 138       | 4           | 13.3 |           |             |   |
|                  |           |             |      | 10        | 1           | 14.3 | 74        | 3           | 10.0 |           |             |   |
|                  |           |             |      |           |             |      | 120       | 3           | 10.0 |           |             |   |
|                  |           |             |      |           |             |      | 124       | 2           | 6.7  |           |             |   |
|                  |           |             |      |           |             |      | 211       | 2           | 6.7  |           |             |   |
|                  |           |             |      |           |             |      | 479       | 2           | 6.7  |           |             |   |
|                  |           |             |      |           |             |      | 48        | 1           | 3.3  |           |             |   |
|                  |           |             |      |           |             |      | 123       | 1           | 3.3  |           |             |   |
|                  |           |             |      |           |             |      | 125       | 1           | 3.3  |           |             |   |
|                  |           |             |      |           |             |      | 126       | 1           | 3.3  |           |             |   |
|                  |           |             |      |           |             |      | 208       | 1           | 3.3  |           |             |   |
|                  |           |             |      |           |             |      | 259       | 1           | 3.3  |           |             |   |
|                  |           |             |      |           |             |      | 280       | 1           | 3.3  |           |             |   |
|                  |           |             |      |           |             |      | 401       | 1           | 3.3  |           |             |   |
|                  |           |             |      |           |             |      | 487       | 1           | 3.3  |           |             |   |
|                  |           |             |      |           |             |      | 488       | 1           | 3.3  |           |             |   |
| <b>Total</b>     | <b>2</b>  | <b>2</b>    |      | <b>3</b>  | <b>7</b>    |      | <b>17</b> | <b>30</b>   |      | <b>0</b>  | <b>0</b>    |   |



| MLST         | Scheme A |          |     | Scheme B |          |      | Scheme C |          |     | Scheme D |          |   |
|--------------|----------|----------|-----|----------|----------|------|----------|----------|-----|----------|----------|---|
| Variant      | Isolate  |          |     | Isolate  |          |      | Isolate  |          |     | Isolate  |          |   |
|              | ST       | (n)      | %   | ST       | (n)      | %    | ST       | (n)      | %   | ST       | (n)      | % |
| <i>Ba</i>    | 3        | 1        | 100 | 12       | 1        | 50.0 | 4        | 1        | 100 |          |          |   |
| n= 2         |          |          |     | 18       | 1        | 50.0 |          |          |     |          |          |   |
| <b>Total</b> | <b>1</b> | <b>1</b> |     | <b>2</b> | <b>2</b> |      | <b>1</b> | <b>1</b> |     | <b>0</b> | <b>0</b> |   |

| MLST         | Scheme A |          |     | Scheme B |           |      | Scheme C |          |      | Scheme D |          |     |
|--------------|----------|----------|-----|----------|-----------|------|----------|----------|------|----------|----------|-----|
| Variant      | Isolate  |          |     | Isolate  |           |      | Isolate  |          |      | Isolate  |          |     |
|              | ST       | (n)      | %   | ST       | (n)       | %    | ST       | (n)      | %    | ST       | (n)      | %   |
| <i>C</i>     | 3        | 1        | 100 | 44       | 6         | 54.5 | 46       | 1        | 50.0 | 33       | 1        | 100 |
| n= 12        |          |          |     | 13       | 2         | 18.2 | 177      | 1        | 50.0 |          |          |     |
|              |          |          |     | 11       | 1         | 9.1  |          |          |      |          |          |     |
|              |          |          |     | 42       | 1         | 9.1  |          |          |      |          |          |     |
|              |          |          |     | 43       | 1         | 9.1  |          |          |      |          |          |     |
| <b>Total</b> | <b>1</b> | <b>1</b> |     | <b>5</b> | <b>11</b> |      | <b>2</b> | <b>2</b> |      | <b>1</b> | <b>1</b> |     |

| MLST         | Scheme A |          |      | Scheme B |          |      | Scheme C   |            |      | Scheme D |          |      |
|--------------|----------|----------|------|----------|----------|------|------------|------------|------|----------|----------|------|
| Variant      | Isolate  |          |      | Isolate  |          |      | Isolate    |            |      | Isolate  |          |      |
|              | ST       | (n)      | %    | ST       | (n)      | %    | ST         | (n)        | %    | ST       | (n)      | %    |
| <i>D</i>     | 13       | 6        | 75.0 | 19       | 3        | 33.3 | 109        | 113        | 24.9 | 6        | 2        | 40.0 |
| n= 461       | 4        | 1        | 12.5 | 2        | 1        | 11.1 | 12         | 62         | 13.7 | 9        | 2        | 40.0 |
|              | 38       | 1        | 12.5 | 20       | 1        | 11.1 | 35         | 39         | 8.6  | 8        | 1        | 40.0 |
|              |          |          |      | 23       | 1        | 11.1 | 77         | 19         | 4.2  |          |          |      |
|              |          |          |      | 25       | 1        | 11.1 | 11         | 11         | 2.4  |          |          |      |
|              |          |          |      | 34       | 1        | 11.1 | 14         | 10         | 2.2  |          |          |      |
|              |          |          |      | 38       | 1        | 11.1 | 20         | 10         | 2.2  |          |          |      |
|              |          |          |      |          |          |      | 13         | 9          | 2.0  |          |          |      |
|              |          |          |      |          |          |      | 85         | 9          | 2.0  |          |          |      |
|              |          |          |      |          |          |      | 248        | 9          | 2.0  |          |          |      |
|              |          |          |      |          |          |      | 395        | 9          | 2.0  |          |          |      |
|              |          |          |      |          |          |      | Others     | 154        | 33.9 |          |          |      |
| <b>Total</b> | <b>3</b> | <b>8</b> |      | <b>7</b> | <b>9</b> |      | <b>101</b> | <b>454</b> |      | <b>3</b> | <b>5</b> |      |

| MLST         | Scheme A |          |     | Scheme B |          |     | Scheme C |          |     | Scheme D |          |   |
|--------------|----------|----------|-----|----------|----------|-----|----------|----------|-----|----------|----------|---|
| Variant      | Isolate  |          |     | Isolate  |          |     | Isolate  |          |     | Isolate  |          |   |
|              | ST       | (n)      | %   | ST       | (n)      | %   | ST       | (n)      | %   | ST       | (n)      | % |
| <i>D(s)</i>  | 38       | 1        | 100 | 34       | 1        | 100 | 12       | 1        | 100 |          |          |   |
| n= 1         |          |          |     |          |          |     |          |          |     |          |          |   |
| <b>Total</b> | <b>1</b> | <b>1</b> |     | <b>1</b> | <b>1</b> |     | <b>1</b> | <b>1</b> |     | <b>0</b> | <b>0</b> |   |

| MLST         | Scheme A |          |     | Scheme B |          |     | Scheme C |          |      | Scheme D |          |   |
|--------------|----------|----------|-----|----------|----------|-----|----------|----------|------|----------|----------|---|
| Variant      | Isolate  |          |     | Isolate  |          |     | Isolate  |          |      | Isolate  |          |   |
|              | ST       | (n)      | %   | ST       | (n)      | %   | ST       | (n)      | %    | ST       | (n)      | % |
| <b>Da</b>    | 5        | 1        | 100 | 37       | 1        | 100 | 85       | 1        | 50.0 |          |          |   |
| n= 3         |          |          |     |          |          |     | 109      | 1        | 50.0 |          |          |   |
| <b>Total</b> | <b>1</b> | <b>1</b> |     | <b>1</b> | <b>1</b> |     | <b>2</b> | <b>2</b> |      | <b>0</b> | <b>0</b> |   |

| MLST         | Scheme A |          |   | Scheme B |          |   | Scheme C |          |      | Scheme D |          |   |
|--------------|----------|----------|---|----------|----------|---|----------|----------|------|----------|----------|---|
| Variant      | Isolate  |          |   | Isolate  |          |   | Isolate  |          |      | Isolate  |          |   |
|              | ST       | (n)      | % | ST       | (n)      | % | ST       | (n)      | %    | ST       | (n)      | % |
| <b>D-K</b>   |          |          |   |          |          |   | 109      | 3        | 75.0 |          |          |   |
| n= 4         |          |          |   |          |          |   | 56       | 1        | 25.0 |          |          |   |
| <b>Total</b> | <b>0</b> | <b>0</b> |   | <b>0</b> | <b>0</b> |   | <b>2</b> | <b>4</b> |      | <b>0</b> | <b>0</b> |   |

| MLST         | Scheme A |          |      | Scheme B |           |      | Scheme C   |             |      | Scheme D |          |      |
|--------------|----------|----------|------|----------|-----------|------|------------|-------------|------|----------|----------|------|
| Variant      | Isolate  |          |      | Isolate  |           |      | Isolate    |             |      | Isolate  |          |      |
|              | ST       | (n)      | %    | ST       | (n)       | %    | ST         | (n)         | %    | ST       | (n)      | %    |
| <b>E</b>     | 4        | 6        | 66.7 | 39       | 15        | 75.0 | 56         | 219         | 20.3 | 2        | 1        | 33.3 |
| n= 1095      | 8        | 1        | 11.1 | 34       | 2         | 10.0 | 3          | 212         | 19.6 | 12       | 1        | 33.3 |
|              | 12       | 1        | 11.1 | 17       | 1         | 5.0  | 55         | 86          | 8.0  | 13       | 1        | 33.3 |
|              | 94       | 1        | 11.1 | 36       | 1         | 5.0  | 59         | 63          | 5.8  |          |          |      |
|              |          |          |      | 40       | 1         | 5.0  | 153        | 42          | 3.9  |          |          |      |
|              |          |          |      |          |           |      | 16         | 32          | 3.0  |          |          |      |
|              |          |          |      |          |           |      | 69         | 32          | 3.0  |          |          |      |
|              |          |          |      |          |           |      | 64         | 22          | 2.0  |          |          |      |
|              |          |          |      |          |           |      | Others     | 373         | 34.5 |          |          |      |
| <b>Total</b> | <b>4</b> | <b>9</b> |      | <b>5</b> | <b>20</b> |      | <b>163</b> | <b>1081</b> |      | <b>3</b> | <b>3</b> |      |

| MLST         | Scheme A |          |      | Scheme B |           |      | Scheme C  |            |      | Scheme D |          |     |
|--------------|----------|----------|------|----------|-----------|------|-----------|------------|------|----------|----------|-----|
| Variant      | Isolate  |          |      | Isolate  |           |      | Isolate   |            |      | Isolate  |          |     |
|              | ST       | (n)      | %    | ST       | (n)       | %    | ST        | (n)        | %    | ST       | (n)      | %   |
| <b>F</b>     | 38       | 3        | 75.0 | 34       | 6         | 60.0 | 12        | 231        | 53.1 | 8        | 1        | 100 |
| n= 442       | 7        | 1        | 25.0 | 35       | 3         | 30.0 | 110       | 33         | 7.6  |          |          |     |
|              |          |          |      | 32       | 1         | 10.0 | 148       | 28         | 6.4  |          |          |     |
|              |          |          |      |          |           |      | 90        | 26         | 6.0  |          |          |     |
|              |          |          |      |          |           |      | 13        | 16         | 3.7  |          |          |     |
|              |          |          |      |          |           |      | 91        | 16         | 3.7  |          |          |     |
|              |          |          |      |          |           |      | 62        | 15         | 3.4  |          |          |     |
|              |          |          |      |          |           |      | Others    | 70         | 16.1 |          |          |     |
| <b>Total</b> | <b>2</b> | <b>4</b> |      | <b>3</b> | <b>10</b> |      | <b>48</b> | <b>435</b> |      | <b>1</b> | <b>1</b> |     |

| MLST         | Scheme A  |          |      | Scheme B  |          |      | Scheme C  |            |      | Scheme D  |          |     |
|--------------|-----------|----------|------|-----------|----------|------|-----------|------------|------|-----------|----------|-----|
| Variant      | Isolate   |          |      | Isolate   |          |      | Isolate   |            |      | Isolate   |          |     |
|              | <i>ST</i> | (n)      | %    | <i>ST</i> | (n)      | %    | <i>ST</i> | (n)        | %    | <i>ST</i> | (n)      | %   |
| <b>G</b>     | 9         | 3        | 60.0 | 21        | 2        | 28.6 | 52        | 103        | 25.8 | 9         | 1        | 100 |
| N= 407       | 6         | 1        | 20.0 | 14        | 1        | 14.3 | 33        | 44         | 11.0 |           |          |     |
|              | 95        | 1        | 20.0 | 19        | 1        | 14.3 | 27        | 24         | 6.0  |           |          |     |
|              |           |          |      | 26        | 1        | 14.3 | 137       | 24         | 6.0  |           |          |     |
|              |           |          |      | 27        | 1        | 14.3 | 128       | 23         | 5.8  |           |          |     |
|              |           |          |      | 30        | 1        | 14.3 | 161       | 16         | 4.0  |           |          |     |
|              |           |          |      |           |          |      | 108       | 13         | 3.3  |           |          |     |
|              |           |          |      |           |          |      | 94        | 11         | 2.8  |           |          |     |
|              |           |          |      |           |          |      | 265       | 11         | 2.8  |           |          |     |
|              |           |          |      |           |          |      | 54        | 131        | 32.7 |           |          |     |
| <b>Total</b> | <b>3</b>  | <b>5</b> |      | <b>6</b>  | <b>7</b> |      | <b>75</b> | <b>400</b> |      | <b>1</b>  | <b>1</b> |     |

| MLST         | Scheme A  |          |     | Scheme B  |          |      | Scheme C  |           |      | Scheme D  |          |   |
|--------------|-----------|----------|-----|-----------|----------|------|-----------|-----------|------|-----------|----------|---|
| Variant      | Isolate   |          |     | Isolate   |          |      | Isolate   |           |      | Isolate   |          |   |
|              | <i>ST</i> | (n)      | %   | <i>ST</i> | (n)      | %    | <i>ST</i> | (n)       | %    | <i>ST</i> | (n)      | % |
| <b>H</b>     | 10        | 1        | 100 | 19        | 2        | 33.3 | 97        | 15        | 26.8 |           |          |   |
| N= 62        |           |          |     | 3         | 1        | 16.7 | 165       | 8         | 14.3 |           |          |   |
|              |           |          |     | 5         | 1        | 16.7 | 34        | 5         | 8.9  |           |          |   |
|              |           |          |     | 29        | 1        | 16.7 | 444       | 5         | 8.9  |           |          |   |
|              |           |          |     | 31        | 1        | 16.7 | 220       | 3         | 5.4  |           |          |   |
|              |           |          |     |           |          |      | 380       | 3         | 5.4  |           |          |   |
|              |           |          |     |           |          |      | 442       | 3         | 5.4  |           |          |   |
|              |           |          |     |           |          |      | 96        | 2         | 3.6  |           |          |   |
|              |           |          |     |           |          |      | 494       | 2         | 3.6  |           |          |   |
|              |           |          |     |           |          |      | 544       | 2         | 3.6  |           |          |   |
|              |           |          |     |           |          |      | Others    | 8         | 14.3 |           |          |   |
| <b>Total</b> | <b>1</b>  | <b>1</b> |     | <b>5</b>  | <b>6</b> |      | <b>18</b> | <b>56</b> |      | <b>0</b>  | <b>0</b> |   |

| MLST                       | Scheme A  |             |     | Scheme B  |             |      | Scheme C  |             |      | Scheme D  |             |   |
|----------------------------|-----------|-------------|-----|-----------|-------------|------|-----------|-------------|------|-----------|-------------|---|
|                            | <i>ST</i> | Isolate (n) | %   | <i>ST</i> | Isolate (n) | %    | <i>ST</i> | Isolate (n) | %    | <i>ST</i> | Isolate (n) | % |
| Variant <b>I</b><br>n= 141 | 5         | 1           | 100 | 7         | 1           | 50.0 | 100       | 29          | 20.9 |           |             |   |
|                            |           |             |     | 9         | 1           | 50.0 | 135       | 21          | 15.1 |           |             |   |
|                            |           |             |     |           |             |      | 101       | 13          | 9.4  |           |             |   |
|                            |           |             |     |           |             |      | 276       | 13          | 9.4  |           |             |   |
|                            |           |             |     |           |             |      | 136       | 7           | 5.0  |           |             |   |
|                            |           |             |     |           |             |      | 274       | 6           | 4.3  |           |             |   |
|                            |           |             |     |           |             |      | 25        | 5           | 3.6  |           |             |   |
|                            |           |             |     |           |             |      | 272       | 5           | 3.6  |           |             |   |
|                            |           |             |     |           |             |      | 518       | 5           | 3.6  |           |             |   |
|                            |           |             |     |           |             |      | 103       | 3           | 2.2  |           |             |   |
|                            |           |             |     |           |             |      | Others    | 32          | 23.0 |           |             |   |
| <b>Total</b>               | <b>1</b>  | <b>1</b>    |     | <b>2</b>  | <b>2</b>    |      | <b>34</b> | <b>139</b>  |      | <b>0</b>  | <b>0</b>    |   |

| MLST                       | Scheme A  |             |     | Scheme B  |             |      | Scheme C  |             |      | Scheme D  |             |     |
|----------------------------|-----------|-------------|-----|-----------|-------------|------|-----------|-------------|------|-----------|-------------|-----|
|                            | <i>ST</i> | Isolate (n) | %   | <i>ST</i> | Isolate (n) | %    | <i>ST</i> | Isolate (n) | %    | <i>ST</i> | Isolate (n) | %   |
| Variant <b>Ia</b><br>n= 11 | 9         | 4           | 100 | 23        | 6           | 66.7 | 37        | 1           | 50.0 | 16        | 4           | 100 |
|                            |           |             |     | 24        | 2           | 22.2 | 136       | 1           | 50.0 |           |             |     |
|                            |           |             |     | 28        | 1           | 11.1 |           |             |      |           |             |     |
| <b>Total</b>               | <b>1</b>  | <b>4</b>    |     | <b>3</b>  | <b>9</b>    |      | <b>2</b>  | <b>2</b>    |      | <b>1</b>  | <b>4</b>    |     |

| MLST            | Scheme A  |          |     | Scheme B  |          |      | Scheme C  |            |      | Scheme D  |          |   |
|-----------------|-----------|----------|-----|-----------|----------|------|-----------|------------|------|-----------|----------|---|
|                 | <i>ST</i> | n        | %   | <i>ST</i> | n        | %    | <i>ST</i> | n          | %    | <i>ST</i> | n        | % |
|                 | Isolate   |          |     | Isolate   |          |      | Isolate   |            |      | Isolate   |          |   |
| Variant         | <i>ST</i> | (n)      | %   | <i>ST</i> | (n)      | %    | <i>ST</i> | (n)        | %    | <i>ST</i> | (n)      | % |
| <b><i>J</i></b> | 9         | 1        | 100 | 9         | 1        | 33.3 | 108       | 72         | 35.3 |           |          |   |
| n= 207          |           |          |     | 16        | 1        | 33.3 | 264       | 15         | 7.4  |           |          |   |
|                 |           |          |     | 19        | 1        | 33.3 | 135       | 11         | 5.4  |           |          |   |
|                 |           |          |     |           |          |      | 233       | 9          | 4.4  |           |          |   |
|                 |           |          |     |           |          |      | 136       | 8          | 3.9  |           |          |   |
|                 |           |          |     |           |          |      | 112       | 7          | 3.4  |           |          |   |
|                 |           |          |     |           |          |      | 232       | 7          | 3.4  |           |          |   |
|                 |           |          |     |           |          |      | 281       | 7          | 3.4  |           |          |   |
|                 |           |          |     |           |          |      | 12        | 6          | 2.9  |           |          |   |
|                 |           |          |     |           |          |      | 98        | 6          | 2.9  |           |          |   |
|                 |           |          |     |           |          |      | 295       | 5          | 2.5  |           |          |   |
|                 |           |          |     |           |          |      | 530       | 5          | 2.5  |           |          |   |
|                 |           |          |     |           |          |      | 267       | 4          | 2.0  |           |          |   |
|                 |           |          |     |           |          |      | Others    | 42         | 20.6 |           |          |   |
| <b>Total</b>    | <b>1</b>  | <b>1</b> |     | <b>3</b>  | <b>3</b> |      | <b>44</b> | <b>204</b> |      | <b>0</b>  | <b>0</b> |   |

| MLST             | Scheme A  |          |   | Scheme B  |          |      | Scheme C  |          |   | Scheme D  |          |   |
|------------------|-----------|----------|---|-----------|----------|------|-----------|----------|---|-----------|----------|---|
|                  | <i>ST</i> | (n)      | % | <i>ST</i> | (n)      | %    | <i>ST</i> | (n)      | % | <i>ST</i> | (n)      | % |
|                  | Isolate   |          |   | Isolate   |          |      | Isolate   |          |   | Isolate   |          |   |
| Variant          | <i>ST</i> | (n)      | % | <i>ST</i> | (n)      | %    | <i>ST</i> | (n)      | % | <i>ST</i> | (n)      | % |
| <b><i>Ja</i></b> |           |          |   | 34        | 2        | 50.0 |           |          |   |           |          |   |
| n= 4             |           |          |   | 9         | 1        | 25.0 |           |          |   |           |          |   |
|                  |           |          |   | 41        | 1        | 25.0 |           |          |   |           |          |   |
| <b>Total</b>     | <b>0</b>  | <b>0</b> |   | <b>3</b>  | <b>4</b> |      | <b>0</b>  | <b>0</b> |   | <b>0</b>  | <b>0</b> |   |

| MLST         | Scheme A |          |     | Scheme B |          |      | Scheme C  |            |      | Scheme D |          |     |
|--------------|----------|----------|-----|----------|----------|------|-----------|------------|------|----------|----------|-----|
|              | Isolate  |          |     | Isolate  |          |      | Isolate   |            |      | Isolate  |          |     |
| Variant      | ST       | (n)      | %   | ST       | (n)      | %    | ST        | (n)        | %    | ST       | (n)      | %   |
| <b>K</b>     | 6        | 1        | 100 | 15       | 2        | 66.7 | 30        | 26         | 22.0 | 9        | 2        | 100 |
| n= 122       |          |          |     | 8        | 1        | 33.3 | 32        | 12         | 10.2 |          |          |     |
|              |          |          |     |          |          |      | 220       | 10         | 8.5  |          |          |     |
|              |          |          |     |          |          |      | 133       | 8          | 6.8  |          |          |     |
|              |          |          |     |          |          |      | 34        | 7          | 5.9  |          |          |     |
|              |          |          |     |          |          |      | 175       | 7          | 5.9  |          |          |     |
|              |          |          |     |          |          |      | 411       | 5          | 4.2  |          |          |     |
|              |          |          |     |          |          |      | 168       | 3          | 2.5  |          |          |     |
|              |          |          |     |          |          |      | Others    | 40         | 33.9 |          |          |     |
| <b>Total</b> | <b>1</b> | <b>1</b> |     | <b>2</b> | <b>3</b> |      | <b>43</b> | <b>118</b> |      | <b>1</b> | <b>2</b> |     |

| MLST         | Scheme A |          |      | Scheme B |          |     | Scheme C |          |      | Scheme D |          |     |
|--------------|----------|----------|------|----------|----------|-----|----------|----------|------|----------|----------|-----|
|              | Isolate  |          |      | Isolate  |          |     | Isolate  |          |      | Isolate  |          |     |
| Variant      | ST       | (n)      | %    | ST       | (n)      | %   | ST       | (n)      | %    | ST       | (n)      | %   |
| <b>LI</b>    | 11       | 2        | 66.7 | 1        | 3        | 100 | 142      | 7        | 77.8 | 3        | 1        | 100 |
| n= 11        | 44       | 1        | 33.3 |          |          |     | 49       | 2        | 22.2 |          |          |     |
| <b>Total</b> | <b>2</b> | <b>3</b> |      | <b>1</b> | <b>3</b> |     | <b>2</b> | <b>9</b> |      | <b>1</b> | <b>1</b> |     |

| MLST         | Scheme A |          |     | Scheme B |          |     | Scheme C |          |   | Scheme D |          |     |
|--------------|----------|----------|-----|----------|----------|-----|----------|----------|---|----------|----------|-----|
|              | Isolate  |          |     | Isolate  |          |     | Isolate  |          |   | Isolate  |          |     |
| Variant      | ST       | (n)      | %   | ST       | (n)      | %   | ST       | (n)      | % | ST       | (n)      | %   |
| <b>LI/L2</b> | 44       | 2        | 100 | 1        | 2        | 100 |          |          |   | 19       | 2        | 100 |
| n= 2         |          |          |     |          |          |     |          |          |   |          |          |     |
| <b>Total</b> | <b>1</b> | <b>2</b> |     | <b>1</b> | <b>2</b> |     | <b>0</b> | <b>0</b> |   | <b>1</b> | <b>2</b> |     |

| MLST         | Scheme A |          |     | Scheme B |          |     | Scheme C |           |      | Scheme D |          |   |
|--------------|----------|----------|-----|----------|----------|-----|----------|-----------|------|----------|----------|---|
|              | Isolate  |          |     | Isolate  |          |     | Isolate  |           |      | Isolate  |          |   |
| Variant      | ST       | (n)      | %   | ST       | (n)      | %   | ST       | (n)       | %    | ST       | (n)      | % |
| <b>L2</b>    | 44       | 4        | 100 | 1        | 5        | 100 | 58       | 21        | 52.5 |          |          |   |
| n= 42        |          |          |     |          |          |     | 141      | 12        | 30.0 |          |          |   |
|              |          |          |     |          |          |     | 143      | 5         | 12.5 |          |          |   |
|              |          |          |     |          |          |     | 144      | 2         | 5.0  |          |          |   |
| <b>Total</b> | <b>1</b> | <b>4</b> |     | <b>1</b> | <b>5</b> |     | <b>4</b> | <b>40</b> |      | <b>0</b> | <b>0</b> |   |

| MLST         | Scheme A |          |   | Scheme B |          |     | Scheme C |          |   | Scheme D |          |   |
|--------------|----------|----------|---|----------|----------|-----|----------|----------|---|----------|----------|---|
|              | Isolate  |          |   | Isolate  |          |     | Isolate  |          |   | Isolate  |          |   |
| Variants     | ST       | (n)      | % | ST       | (n)      | %   | ST       | (n)      | % | ST       | (n)      | % |
| <b>L2a</b>   |          |          |   | <i>1</i> | 1        | 100 |          |          |   |          |          |   |
| n= 1         |          |          |   |          |          |     |          |          |   |          |          |   |
| <b>Total</b> | <b>0</b> | <b>0</b> |   | <b>1</b> | <b>1</b> |     | <b>0</b> | <b>0</b> |   | <b>0</b> | <b>0</b> |   |

| MLST         | Scheme A  |           |     | Scheme B  |           |      | Scheme C   |           |      | Scheme D  |           |      |
|--------------|-----------|-----------|-----|-----------|-----------|------|------------|-----------|------|-----------|-----------|------|
|              | Isolate   |           |     | Isolate   |           |      | Isolate    |           |      | Isolate   |           |      |
| Variants     | ST        | (n)       | %   | ST        | (n)       | %    | ST         | (n)       | %    | ST        | (n)       | %    |
| <b>L2b</b>   | <i>44</i> | 14        | 100 | <i>1</i>  | 14        | 87.5 | <i>58</i>  | 87        | 97.8 | <i>21</i> | 11        | 91.7 |
| n= 92        |           |           |     | <i>33</i> | 2         | 12.5 | <i>143</i> | 2         | 2.2  | <i>31</i> | 1         | 8.3  |
| <b>Total</b> | <b>1</b>  | <b>14</b> |     | <b>2</b>  | <b>16</b> |      | <b>2</b>   | <b>89</b> |      | <b>2</b>  | <b>12</b> |      |

| MLST         | Scheme A |          |   | Scheme B |          |     | Scheme C |          |   | Scheme D |          |   |
|--------------|----------|----------|---|----------|----------|-----|----------|----------|---|----------|----------|---|
|              | Isolate  |          |   | Isolate  |          |     | Isolate  |          |   | Isolate  |          |   |
| Variants     | ST       | (n)      | % | ST       | (n)      | %   | ST       | (n)      | % | ST       | (n)      | % |
| <b>L2bl</b>  |          |          |   | <i>1</i> | 1        | 100 |          |          |   |          |          |   |
| n= 1         |          |          |   |          |          |     |          |          |   |          |          |   |
| <b>Total</b> | <b>0</b> | <b>0</b> |   | <b>1</b> | <b>1</b> |     | <b>0</b> | <b>0</b> |   | <b>0</b> | <b>0</b> |   |

| MLST         | Scheme A  |          |     | Scheme B |          |     | Scheme C |          |   | Scheme D |          |   |
|--------------|-----------|----------|-----|----------|----------|-----|----------|----------|---|----------|----------|---|
|              | Isolate   |          |     | Isolate  |          |     | Isolate  |          |   | Isolate  |          |   |
| Variants     | ST        | (n)      | %   | ST       | (n)      | %   | ST       | (n)      | % | ST       | (n)      | % |
| <b>L2c</b>   | <i>44</i> | 1        | 100 | <i>1</i> | 1        | 100 |          |          |   |          |          |   |
| n= 1         |           |          |     |          |          |     |          |          |   |          |          |   |
| <b>Total</b> | <b>1</b>  | <b>1</b> |     | <b>1</b> | <b>1</b> |     | <b>0</b> | <b>0</b> |   | <b>0</b> | <b>0</b> |   |



| MLST         | Scheme A |          |     | Scheme B |          |     | Scheme C |          |     | Scheme D |          |   |
|--------------|----------|----------|-----|----------|----------|-----|----------|----------|-----|----------|----------|---|
| Variant      | Isolate  |          |     | Isolate  |          |     | Isolate  |          |     | Isolate  |          |   |
|              | ST       | (n)      | %   | ST       | (n)      | %   | ST       | (n)      | %   | ST       | (n)      | % |
| <b>L3</b>    | 44       | 2        | 100 | 1        | 2        | 100 | 51       | 1        | 100 |          |          |   |
| n= 3         |          |          |     |          |          |     |          |          |     |          |          |   |
| <b>Total</b> | <b>1</b> | <b>2</b> |     | <b>1</b> | <b>2</b> |     | <b>1</b> | <b>1</b> |     | <b>1</b> | <b>0</b> |   |

| MLST         | Scheme A |          |   | Scheme B |          |   | Scheme C |          |     | Scheme D |          |   |
|--------------|----------|----------|---|----------|----------|---|----------|----------|-----|----------|----------|---|
| Variant      | Isolate  |          |   | Isolate  |          |   | Isolate  |          |     | Isolate  |          |   |
|              | ST       | (n)      | % | ST       | (n)      | % | ST       | (n)      | %   | ST       | (n)      | % |
| <b>LGV</b>   |          |          |   |          |          |   | 58       | 2        | 100 |          |          |   |
| n= 2         |          |          |   |          |          |   |          |          |     |          |          |   |
| <b>Total</b> | <b>0</b> | <b>0</b> |   | <b>0</b> | <b>0</b> |   | <b>1</b> | <b>2</b> |     | <b>0</b> | <b>0</b> |   |

# Supplementary Figure S4.

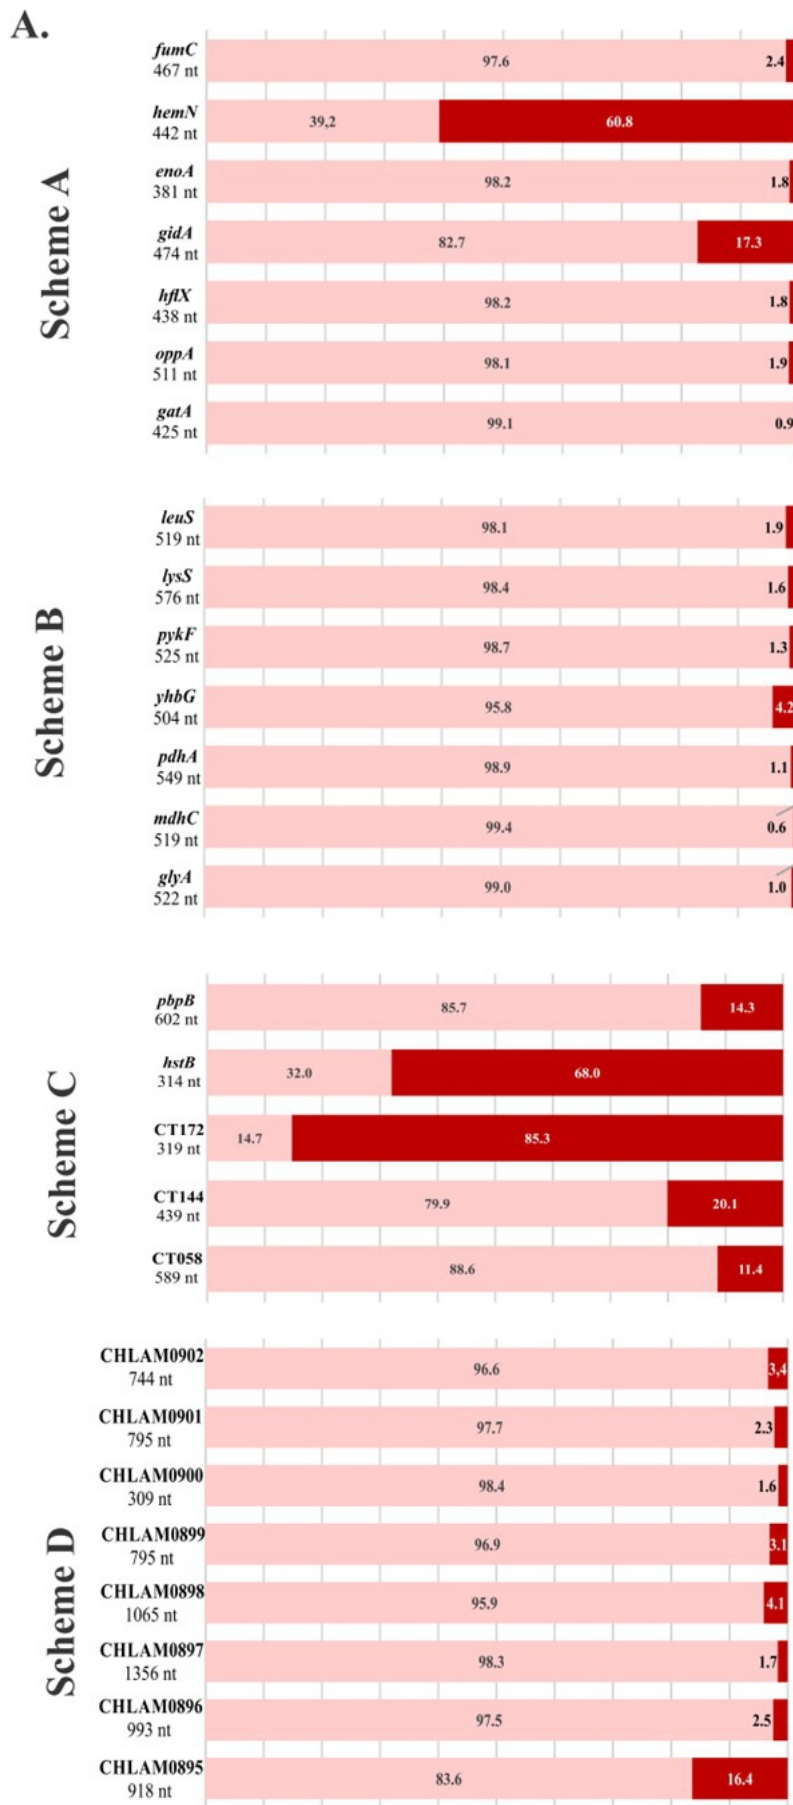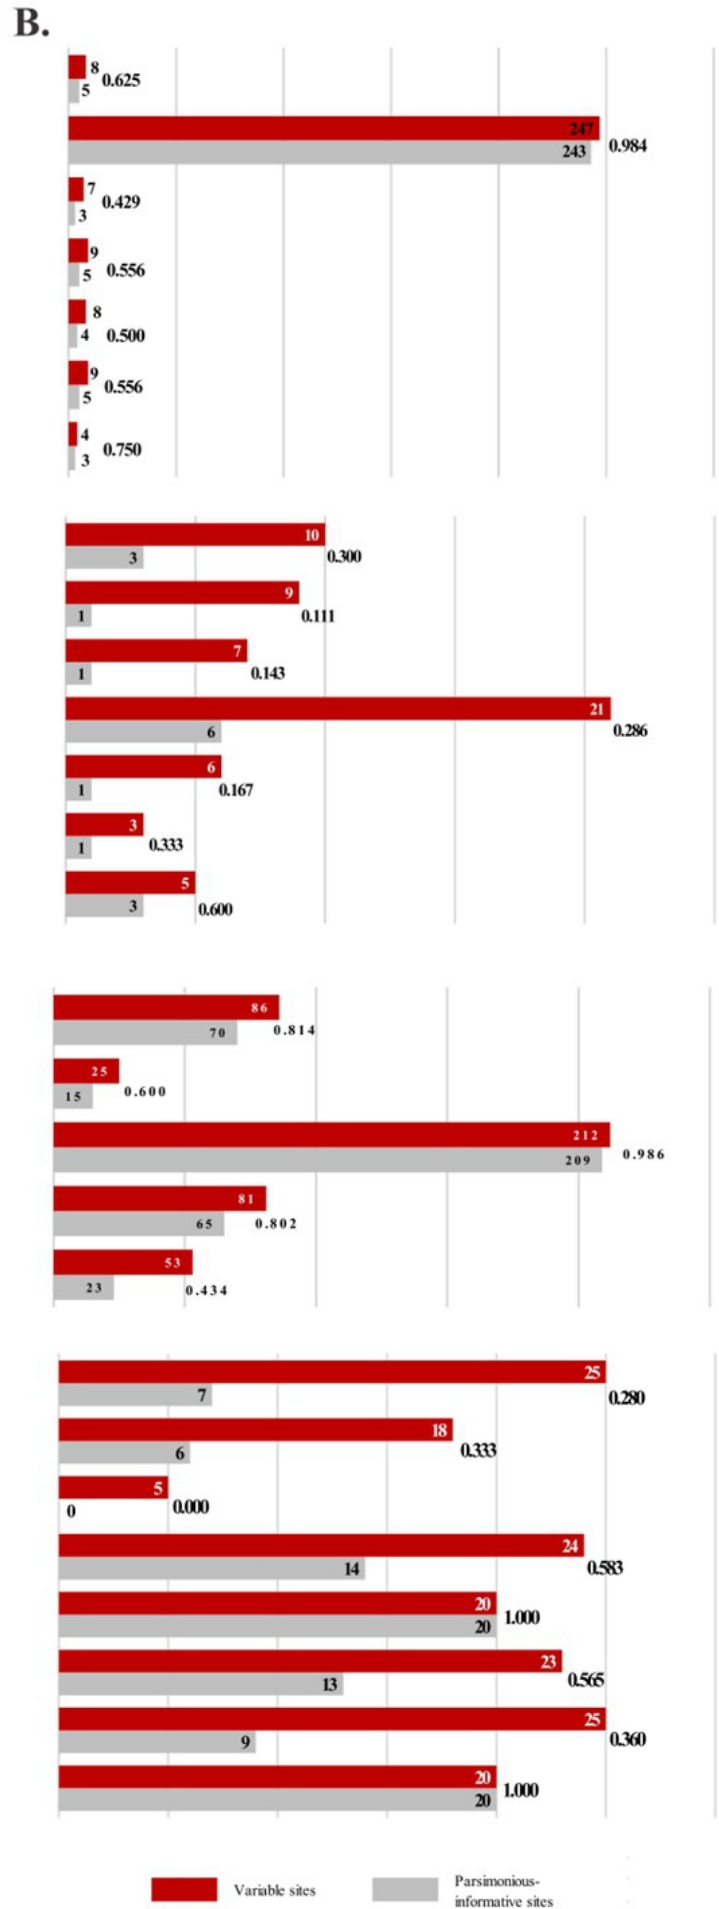

Identity (%) Difference (%)

Variable sites Parsimonious-informative sites

## Supplementary Table S4.

**A**

| Gene         | Max length | Number of sequences used | Total number of sites (excluding sites with gaps / missing data) | Number of polymorphic (segregating) sites (S) | Total number of mutations (Eta) | Number of haplotypes (h) | Haplotype diversity (Hd) | Nucleotide diversity ( $\pi$ ) | Theta (per site) from Eta | Theta (per site) from S (ThetaW) | Average number of nucleotide differences (k) |
|--------------|------------|--------------------------|------------------------------------------------------------------|-----------------------------------------------|---------------------------------|--------------------------|--------------------------|--------------------------------|---------------------------|----------------------------------|----------------------------------------------|
| <i>gatA</i>  | 425        | 75                       | 425                                                              | 4                                             | 4                               | 5                        | 0.668 ± 0.041            | 0.00195                        | 0.00193                   | 0.00193 ± 0.00105                | 0.830                                        |
| <i>oppA</i>  | 471        | 75                       | 471                                                              | 9                                             | 9                               | 10                       | 0.624 ± 0.053            | 0.00256                        | 0.00391                   | 0.00391 ± 0.00160                | 1.208                                        |
| <i>hflX</i>  | 435        | 75                       | 435                                                              | 8                                             | 8                               | 10                       | 0.708 ± 0.037            | 0.00307                        | 0.00376                   | 0.00376 ± 0.00160                | 1.334                                        |
| <i>gidA</i>  | 474        | 75                       | 400                                                              | 8                                             | 8                               | 10                       | 0.771 ± 0.027            | 0.00294                        | 0.00409                   | 0.00409 ± 0.00174                | 1.177                                        |
| <i>enoA</i>  | 381        | 75                       | 381                                                              | 7                                             | 7                               | 8                        | 0.639 ± 0.039            | 0.00207                        | 0.00376                   | 0.00376 ± 0.00167                | 0.790                                        |
| <i>hemN</i>  | 432        | 75                       | 420                                                              | 247                                           | 248                             | 7                        | 0.328 ± 0.066            | 0.03129                        | 0.12080                   | 0.12031 ± 0.03131                | 13.144                                       |
| <i>fumC</i>  | 466        | 75                       | 464                                                              | 8                                             | 8                               | 6                        | 0.348 ± 0.067            | 0.00178                        | 0.00353                   | 0.00353 ± 0.00150                | 0.827                                        |
| Concatenated | 3084       | 75                       | 2996                                                             | 291                                           | 292                             | 73                       | 0.999 ± 0.002            | 0.00645                        | 0.01994                   | 0.00987 ± 0.00515                | 19.310                                       |

**B**

| Gene        | Max length | Number of sequences used | Total number of sites (excluding sites with gaps / missing data) | Number of polymorphic (segregating) sites (S) | Total number of mutations (Eta) | Number of haplotypes (h) | Haplotype diversity (Hd) | Nucleotide diversity ( $\pi$ ) | Theta (per site) from Eta | Theta (per site) from S (ThetaW) | Average number of nucleotide differences (k) |
|-------------|------------|--------------------------|------------------------------------------------------------------|-----------------------------------------------|---------------------------------|--------------------------|--------------------------|--------------------------------|---------------------------|----------------------------------|----------------------------------------------|
| <i>glyA</i> | 522        | 7                        | 522                                                              | 5                                             | 5                               | 7                        | 1.000 $\pm$ 0.076        | 0.00401                        | 0.00391                   | 0.00391 $\pm$ 0.00234            | 2.095                                        |
| <i>mdhC</i> | 519        | 4                        | 519                                                              | 3                                             | 3                               | 4                        | 1.000 $\pm$ 0.177        | 0.00321                        | 0.00315                   | 0.00315 $\pm$ 0.00229            | 1.667                                        |
| <i>pdhA</i> | 549        | 7                        | 549                                                              | 6                                             | 6                               | 7                        | 1.000 $\pm$ 0.076        | 0.00347                        | 0.00446                   | 0.00446 $\pm$ 0.0257             | 1.905                                        |
| <i>yhbG</i> | 504        | 8                        | 504                                                              | 21                                            | 22                              | 8                        | 1.000 $\pm$ 0.063        | 0.01403                        | 0.01684                   | 0.01607 $\pm$ 0.00758            | 7.071                                        |
| <i>pykF</i> | 525        | 7                        | 525                                                              | 7                                             | 7                               | 7                        | 1.000 $\pm$ 0.076        | 0.00417                        | 0.00544                   | 0.00544 $\pm$ 0.00305            | 2.191                                        |
| <i>lysS</i> | 576        | 8                        | 576                                                              | 9                                             | 9                               | 8                        | 1.000 $\pm$ 0.063        | 0.00440                        | 0.00603                   | 0.00603 $\pm$ 0.00316            | 2.536                                        |
| <i>leuS</i> | 519        | 11                       | 519                                                              | 10                                            | 11                              | 11                       | 1.000 $\pm$ 0.039        | 0.00522                        | 0.00724                   | 0.00658 $\pm$ 0.00321            | 2.709                                        |
| Concatenado | 3729       | 44                       | 3714                                                             | 61                                            | 63                              | 44                       | 1.000 $\pm$ 0.005        | 0.00255                        | 0.00390                   | 0.00378 $\pm$ 0.00116            | 9.482                                        |

## C

| Gene         | Max length | Number of sequences used | Total number of sites (excluding sites with gaps / missing data) | Number of polymorphic (segregating) sites (S) | Total number of mutations (Eta) | Number of haplotypes (h) | Haplotype diversity (Hd) | Nucleotide diversity ( $\pi$ ) | Theta (per site) from Eta | Theta (per site) from S (ThetaW) | Average number of nucleotide differences (k) |
|--------------|------------|--------------------------|------------------------------------------------------------------|-----------------------------------------------|---------------------------------|--------------------------|--------------------------|--------------------------------|---------------------------|----------------------------------|----------------------------------------------|
| CT058        | 605        | 53                       | 589                                                              | 53                                            | 55                              | 44                       | $0.990 \pm 0.007$        | 0.01086                        | 0.02058                   | $0.01983 \pm 0.00597$            | 6.399                                        |
| CT144        | 448        | 30                       | 439                                                              | 81                                            | 83                              | 30                       | $1.000 \pm 0.009$        | 0.05683                        | 0.04772                   | $0.04657 \pm 0.01504$            | 24.949                                       |
| CT172        | 708        | 41                       | 319                                                              | 212                                           | 246                             | 13                       | $0.801 \pm 0.044$        | 0.18962                        | 0.18024                   | $0.15533 \pm 0.04546$            | 60.489                                       |
| <i>hstB</i>  | 909        | 92                       | 314                                                              | 25                                            | 26                              | 19                       | $0.829 \pm 0.023$        | 0.00997                        | 0.01626                   | $0.01563 \pm 0.00487$            | 3.132                                        |
| <i>pbpB</i>  | 602        | 36                       | 602                                                              | 86                                            | 88                              | 36                       | $1.000 \pm 0.007$        | 0.02752                        | 0.03525                   | $0.03445 \pm 0.01071$            | 16.570                                       |
| Concatenated | 3138       | 183                      | 2957                                                             | 1737                                          | 2847                            | 176                      | $0.9995 \pm 0.0007$      | 0.22224                        | 0.16646                   | $0.10156 \pm 0.02208$            | 657.169                                      |

# D

| Gene             | Max length | Number of sequences used | Total number of sites (excluding sites with gaps / missing data) | Number of polymorphic (segregating) sites (S) | Total number of mutations (Eta) | Number of haplotypes (h) | Haplotype diversity (Hd) | Nucleotide diversity ( $\pi$ ) | Theta (per site) from Eta | Theta (per site) from S (ThetaW) | Average number of nucleotide differences (k) |
|------------------|------------|--------------------------|------------------------------------------------------------------|-----------------------------------------------|---------------------------------|--------------------------|--------------------------|--------------------------------|---------------------------|----------------------------------|----------------------------------------------|
| <i>CHLAM0895</i> | 918        | 16                       | 381                                                              | 16                                            | 16                              | 10                       | $0.933 \pm 0.040$        | 0.00454                        | 0.00616                   | $0.00616 \pm 0.00261$            | 3.558                                        |
| <i>CHLAM0896</i> | 993        | 18                       | 993                                                              | 25                                            | 25                              | 18                       | $1.000 \pm 0.019$        | 0.00565                        | 0.00732                   | $0.00732 \pm 0.00287$            | 5.608                                        |
| <i>CHLAM0897</i> | 1356       | 17                       | 1356                                                             | 23                                            | 23                              | 17                       | $1.000 \pm 0.020$        | 0.00436                        | 0.00502                   | $0.00502 \pm 0.00201$            | 5.912                                        |
| <i>CHLAM0898</i> | 1065       | 16                       | 1041                                                             | 21                                            | 22                              | 15                       | $0.992 \pm 0.025$        | 0.00572                        | 0.00637                   | $0.00608 \pm 0.00249$            | 5.958                                        |
| <i>CHLAM0899</i> | 795        | 13                       | 795                                                              | 24                                            | 26                              | 13                       | $1.000 \pm 0.030$        | 0.00950                        | 0.01054                   | $0.00973 \pm 0.00408$            | 7.551                                        |
| <i>CHLAM0900</i> | 309        | 6                        | 309                                                              | 5                                             | 5                               | 6                        | $1.000 \pm 0.096$        | 0.00539                        | 0.00709                   | $0.00709 \pm 0.00434$            | 1.667                                        |
| <i>CHLAM0901</i> | 795        | 16                       | 795                                                              | 18                                            | 19                              | 16                       | $1.000 \pm 0.022$        | 0.00498                        | 0.00720                   | $0.00682 \pm 0.00285$            | 3.958                                        |
| <i>CHLAM0902</i> | 744        | 22                       | 744                                                              | 25                                            | 26                              | 22                       | $1.000 \pm 0.014$        | 0.00539                        | 0.00959                   | $0.00922 \pm 0.00349$            | 4.013                                        |
| Concatenated     | 6975       | 47                       | 6963                                                             | 147                                           | 152                             | 46                       | $0.9999 \pm 0.005$       | 0.00455                        | 0.00494                   | $0.00478 \pm 0.00138$            | 31.654                                       |

# Supplementary Table S5.

## Scheme A (Chlamydiales-Ct)

No. isolates = 75 | No. STs = 75 | No. re-samplings for bootstrapping = 1000

No. loci per isolate = 7 | No. identical loci for group def = 6 | No. groups = 3

| Group 1: No. Isolates = 36   No. STs = 36   Predicted Founder = 13 |      |     |     |     |     |                  |                    |        |  |
|--------------------------------------------------------------------|------|-----|-----|-----|-----|------------------|--------------------|--------|--|
| ST                                                                 | FREQ | SLV | DLV | TLV | SAT | Average Distance | ST Bootstrap Group | Subgrp |  |
| 13                                                                 |      | 1   | 11  | 20  | 4   | 0 1.8            | 81%                | 97%    |  |
| 6                                                                  |      | 1   | 9   | 13  | 10  | 3 2.2            | 32%                | 92%    |  |
| 132                                                                |      | 1   | 8   | 9   | 11  | 7 2.48           | 19%                | 83%    |  |
| 9                                                                  |      | 1   | 7   | 18  | 10  | 0 2.08           | 11%                | 67%    |  |
| 136                                                                |      | 1   | 7   | 14  | 14  | 0 2.2            | 6%                 | 61%    |  |
| 3                                                                  |      | 1   | 6   | 12  | 13  | 4 2.42           | 3%                 | 50%    |  |
| 95                                                                 |      | 1   | 5   | 13  | 13  | 4 2.45           | 0%                 | 13%    |  |
| 141                                                                |      | 1   | 5   | 11  | 12  | 7 2.6            | 1%                 | 20%    |  |
| 10                                                                 |      | 1   | 3   | 18  | 14  | 0 2.31           | 0%                 | 0%     |  |
| 99                                                                 |      | 1   | 3   | 15  | 13  | 4 2.51           | 0%                 | 0%     |  |
| 106                                                                |      | 1   | 3   | 14  | 18  | 0 2.42           | 0%                 | 0%     |  |
| 113                                                                |      | 1   | 3   | 11  | 14  | 7 2.71           | 0%                 | 0%     |  |
| 5                                                                  |      | 1   | 3   | 10  | 18  | 4 2.65           | 0%                 | 0%     |  |
| 112                                                                |      | 1   | 3   | 10  | 18  | 4 2.65           | 0%                 | 0%     |  |
| 101                                                                |      | 1   | 3   | 10  | 14  | 8 2.85           | 0%                 | 2%     |  |
| 144                                                                |      | 1   | 3   | 7   | 18  | 7 2.82           | 0%                 | 0%     |  |
| 143                                                                |      | 1   | 3   | 7   | 18  | 7 2.82           | 0%                 | 0%     |  |
| 39                                                                 |      | 1   | 2   | 19  | 11  | 3 2.42           | 0%                 | 0%     |  |
| 137                                                                |      | 1   | 2   | 12  | 14  | 7 2.74           | 0%                 | 0%     |  |
| 140                                                                |      | 1   | 2   | 11  | 12  | 10 2.88          | 0%                 | 0%     |  |
| 96                                                                 |      | 1   | 2   | 10  | 19  | 4 2.71           | 0%                 | 0%     |  |
| 42                                                                 |      | 1   | 2   | 10  | 16  | 7 2.8            | 0%                 | 0%     |  |
| 105                                                                |      | 1   | 2   | 10  | 16  | 7 2.8            | 0%                 | 0%     |  |
| 100                                                                |      | 1   | 2   | 9   | 12  | 12 3.05          | 0%                 | 0%     |  |
| 117                                                                |      | 1   | 2   | 8   | 14  | 11 2.97          | 0%                 | 0%     |  |
| 45                                                                 |      | 1   | 2   | 8   | 14  | 11 2.97          | 0%                 | 0%     |  |
| 15                                                                 |      | 1   | 2   | 7   | 13  | 13 3.08          | 0%                 | 0%     |  |
| 14                                                                 |      | 1   | 2   | 7   | 13  | 13 3.08          | 0%                 | 0%     |  |
| 145                                                                |      | 1   | 2   | 7   | 8   | 18 3.34          | 0%                 | 0%     |  |
| 102                                                                |      | 1   | 2   | 6   | 19  | 8 2.94           | 0%                 | 0%     |  |
| 147                                                                |      | 1   | 2   | 6   | 9   | 18 3.37          | 0%                 | 0%     |  |
| 131                                                                |      | 1   | 2   | 6   | 9   | 18 3.37          | 0%                 | 0%     |  |
| 92                                                                 |      | 1   | 2   | 5   | 19  | 9 3.08           | 0%                 | 0%     |  |
| 119                                                                |      | 1   | 1   | 8   | 15  | 11 3.08          | 0%                 | 0%     |  |
| 1                                                                  |      | 1   | 1   | 5   | 14  | 15 3.31          | 0%                 | 0%     |  |
| 108                                                                |      | 1   | 1   | 4   | 17  | 13 3.2           | 0%                 | 0%     |  |



Group 2: No. Isolates = 26 | No. STs = 26 | Predicted Founder = 4

| ST  | FREQ | SLV | DLV | TLV | SAT | Average  | ST Bootstrap |        |
|-----|------|-----|-----|-----|-----|----------|--------------|--------|
|     |      |     |     |     |     | Distance | Group        | Subgrp |
| 4   |      | 1   | 11  | 12  | 2   | 0 1.64   | 92%          | 98%    |
| 133 |      | 1   | 8   | 13  | 4   | 0 1.84   | 31%          | 89%    |
| 8   |      | 1   | 7   | 14  | 4   | 0 1.88   | 19%          | 67%    |
| 12  |      | 1   | 5   | 13  | 7   | 0 2.08   | 5%           | 26%    |
| 135 |      | 1   | 5   | 9   | 10  | 1 2.28   | 4%           | 26%    |
| 146 |      | 1   | 4   | 10  | 10  | 1 2.32   | 0%           | 4%     |
| 110 |      | 1   | 4   | 10  | 9   | 2 2.36   | 1%           | 9%     |
| 38  |      | 1   | 4   | 9   | 10  | 2 2.4    | 1%           | 12%    |
| 134 |      | 1   | 4   | 7   | 10  | 4 2.56   | 0%           | 8%     |
| 121 |      | 1   | 3   | 17  | 5   | 0 2.08   | 0%           | 0%     |
| 7   |      | 1   | 3   | 10  | 11  | 1 2.4    | 0%           | 0%     |
| 91  |      | 1   | 3   | 8   | 10  | 4 2.6    | 0%           | 2%     |
| 109 |      | 1   | 2   | 15  | 8   | 0 2.24   | 0%           | 0%     |
| 120 |      | 1   | 2   | 12  | 9   | 2 2.44   | 0%           | 0%     |
| 138 |      | 1   | 2   | 11  | 11  | 1 2.44   | 0%           | 0%     |
| 93  |      | 1   | 2   | 11  | 10  | 2 2.48   | 0%           | 0%     |
| 97  |      | 1   | 2   | 9   | 11  | 3 2.6    | 0%           | 0%     |
| 139 |      | 1   | 2   | 9   | 10  | 4 2.64   | 0%           | 0%     |
| 94  |      | 1   | 2   | 6   | 11  | 6 2.84   | 0%           | 0%     |
| 142 |      | 1   | 2   | 4   | 11  | 8 3.04   | 0%           | 0%     |
| 123 |      | 1   | 2   | 2   | 12  | 9 3.16   | 0%           | 0%     |
| 111 |      | 1   | 1   | 12  | 12  | 0 2.44   | 0%           | 0%     |
| 114 |      | 1   | 1   | 10  | 12  | 2 2.6    | 0%           | 0%     |
| 115 |      | 1   | 1   | 6   | 15  | 3 2.8    | 0%           | 0%     |
| 104 |      | 1   | 1   | 6   | 12  | 6 2.92   | 0%           | 0%     |
| 103 |      | 1   | 1   | 3   | 10  | 11 3.32  | 0%           | 0%     |

Group 3: No. Isolates = 7 | No. STs = 7 | Predicted Founder = 44

| ST  | FREQ | SLV | DLV | TLV | SAT | Average  | ST Bootstrap |        |
|-----|------|-----|-----|-----|-----|----------|--------------|--------|
|     |      |     |     |     |     | Distance | Group        | Subgrp |
| 44  |      | 1   | 6   | 0   | 0   | 0 1.0    | 99%          | 93%    |
| 128 |      | 1   | 2   | 4   | 0   | 0 1.66   | 0%           | 0%     |
| 116 |      | 1   | 2   | 4   | 0   | 0 1.66   | 0%           | 0%     |
| 127 |      | 1   | 2   | 4   | 0   | 0 1.66   | 0%           | 0%     |
| 122 |      | 1   | 2   | 4   | 0   | 0 1.66   | 0%           | 0%     |
| 2   |      | 1   | 2   | 4   | 0   | 0 1.66   | 0%           | 0%     |
| 11  |      | 1   | 2   | 4   | 0   | 0 1.66   | 0%           | 0%     |

Singletons: size 6

- 126
- 125
- 124
- 118
- 107
- 98

**Scheme B (*C. trachomatis*)**

No. isolates = 44 | No. STs = 44 | No. re-samplings for bootstrapping = 1000

No. loci per isolate = 7 | No. identical loci for group def = 6 | No. groups = 3

Group 1: No. Isolates = 19 | No. STs = 19 | Predicted Founder = 19

| ST | FREQ | SLV | DLV | TLV | SAT | Average Distance | ST Bootstrap Group | Subgrp |
|----|------|-----|-----|-----|-----|------------------|--------------------|--------|
| 19 |      | 1   | 9   | 9   | 0   | 0 1.5            | 88%                | 98%    |
| 23 |      | 1   | 7   | 9   | 2   | 0 1.72           | 42%                | 87%    |
| 21 |      | 1   | 5   | 9   | 4   | 0 1.94           | 13%                | 42%    |
| 27 |      | 1   | 4   | 9   | 5   | 0 2.05           | 4%                 | 18%    |
| 29 |      | 1   | 4   | 6   | 7   | 1 2.27           | 3%                 | 8%     |
| 20 |      | 1   | 3   | 11  | 4   | 0 2.05           | 1%                 | 0%     |
| 24 |      | 1   | 3   | 9   | 6   | 0 2.16           | 0%                 | 5%     |
| 8  |      | 1   | 3   | 8   | 7   | 0 2.22           | 1%                 | 0%     |
| 5  |      | 1   | 3   | 6   | 8   | 1 2.38           | 0%                 | 0%     |
| 31 |      | 1   | 3   | 6   | 8   | 1 2.38           | 0%                 | 0%     |
| 16 |      | 1   | 3   | 5   | 10  | 0 2.38           | 1%                 | 4%     |
| 17 |      | 1   | 2   | 14  | 2   | 0 2.0            | 0%                 | 0%     |
| 30 |      | 1   | 2   | 11  | 5   | 0 2.16           | 0%                 | 0%     |
| 7  |      | 1   | 2   | 9   | 7   | 0 2.27           | 0%                 | 0%     |
| 9  |      | 1   | 2   | 7   | 8   | 1 2.44           | 0%                 | 0%     |
| 15 |      | 1   | 2   | 5   | 11  | 0 2.5            | 0%                 | 0%     |
| 3  |      | 1   | 1   | 8   | 9   | 0 2.44           | 0%                 | 0%     |
| 14 |      | 1   | 1   | 6   | 8   | 3 2.72           | 0%                 | 0%     |
| 28 |      | 1   | 1   | 5   | 11  | 1 2.66           | 0%                 | 0%     |

Group 2: No. Isolates = 7 | No. STs = 7 | Predicted Founder = 11

| ST | FREQ | SLV | DLV | TLV | SAT | Average Distance | ST Bootstrap Group | Subgrp |
|----|------|-----|-----|-----|-----|------------------|--------------------|--------|
| 11 |      | 1   | 3   | 3   | 0   | 0 1.5            | 49%                | 19%    |
| 43 |      | 1   | 3   | 2   | 1   | 0 1.66           | 36%                | 20%    |
| 13 |      | 1   | 2   | 3   | 1   | 0 1.83           | 10%                | 0%     |
| 44 |      | 1   | 2   | 2   | 2   | 0 2.0            | 9%                 | 0%     |
| 12 |      | 1   | 2   | 2   | 2   | 0 2.0            | 8%                 | 0%     |
| 42 |      | 1   | 1   | 2   | 2   | 1 2.5            | 0%                 | 0%     |
| 10 |      | 1   | 1   | 2   | 2   | 1 2.5            | 0%                 | 0%     |

Group 3: No. Isolates = 7 | No. STs = 7 | Predicted Founder = 34

| ST | FREQ | SLV | DLV | TLV | SAT | Average<br>Distance | ST Bootstrap |        |
|----|------|-----|-----|-----|-----|---------------------|--------------|--------|
|    |      |     |     |     |     |                     | Group        | Subgrp |
| 34 |      | 1   | 4   | 2   | 0   | 0 1.33              | 71%          | 56%    |
| 39 |      | 1   | 3   | 3   | 0   | 0 1.5               | 32%          | 16%    |
| 36 |      | 1   | 2   | 3   | 1   | 0 1.83              | 4%           | 0%     |
| 40 |      | 1   | 2   | 2   | 2   | 0 2.0               | 9%           | 0%     |
| 38 |      | 1   | 1   | 3   | 2   | 0 2.16              | 0%           | 0%     |
| 35 |      | 1   | 1   | 3   | 2   | 0 2.16              | 0%           | 0%     |
| 32 |      | 1   | 1   | 2   | 3   | 0 2.33              | 0%           | 0%     |

Singletons: size 11

26

25

22

18

6

4

2

1

41

37

33

**Scheme C (C. trachomatis Uppsala)**

No. isolates = 520 | No. STs = 520 | No. re-samplings for bootstrapping = 1000

No. loci per isolate = 5 | No. identical loci for group def = 4 | No. groups = 15

| Group 1: No. Isolates = 241   No. STs = 241   Predicted Founder = 56 |      |     |     |     |     |                  |                    |        |
|----------------------------------------------------------------------|------|-----|-----|-----|-----|------------------|--------------------|--------|
| ST                                                                   | FREQ | SLV | DLV | TLV | SAT | Average Distance | ST Bootstrap Group | Subgrp |
| 56                                                                   | 1    | 37  | 52  | 79  | 72  | 2.80             | 88%                | 100%   |
| 236                                                                  | 1    | 32  | 81  | 72  | 55  | 2.64             | 36%                | 99%    |
| 59                                                                   | 1    | 30  | 51  | 71  | 88  | 2.94             | 11%                | 98%    |
| 3                                                                    | 1    | 28  | 23  | 51  | 138 | 3.46             | 13%                | 100%   |
| 12                                                                   | 1    | 27  | 33  | 78  | 102 | 3.23             | 8%                 | 100%   |
| 153                                                                  | 1    | 25  | 56  | 72  | 87  | 2.96             | 0%                 | 36%    |
| 64                                                                   | 1    | 25  | 55  | 73  | 87  | 2.96             | 0%                 | 38%    |
| 504                                                                  | 1    | 24  | 57  | 71  | 88  | 2.97             | 0%                 | 9%     |
| 513                                                                  | 1    | 23  | 59  | 73  | 85  | 2.95             | 0%                 | 0%     |
| 171                                                                  | 1    | 23  | 58  | 74  | 85  | 2.96             | 0%                 | 0%     |
| 73                                                                   | 1    | 23  | 57  | 73  | 87  | 2.97             | 0%                 | 0%     |
| 214                                                                  | 1    | 23  | 57  | 72  | 88  | 2.97             | 0%                 | 0%     |
| 154                                                                  | 1    | 23  | 57  | 72  | 88  | 2.97             | 0%                 | 0%     |
| 497                                                                  | 1    | 23  | 57  | 72  | 88  | 2.97             | 0%                 | 0%     |
| 496                                                                  | 1    | 23  | 57  | 72  | 88  | 2.97             | 0%                 | 0%     |
| 70                                                                   | 1    | 23  | 57  | 72  | 88  | 2.97             | 0%                 | 0%     |
| 334                                                                  | 1    | 23  | 57  | 72  | 88  | 2.97             | 0%                 | 0%     |
| 327                                                                  | 1    | 22  | 60  | 71  | 87  | 2.97             | 0%                 | 0%     |
| 310                                                                  | 1    | 22  | 58  | 73  | 87  | 2.97             | 0%                 | 0%     |
| 515                                                                  | 1    | 22  | 58  | 73  | 87  | 2.97             | 0%                 | 0%     |
| 323                                                                  | 1    | 22  | 58  | 72  | 88  | 2.98             | 0%                 | 0%     |
| 184                                                                  | 1    | 22  | 58  | 72  | 88  | 2.98             | 0%                 | 0%     |
| 114                                                                  | 1    | 22  | 58  | 72  | 88  | 2.98             | 0%                 | 0%     |
| 377                                                                  | 1    | 22  | 58  | 72  | 88  | 2.98             | 0%                 | 0%     |
| 331                                                                  | 1    | 22  | 58  | 72  | 88  | 2.98             | 0%                 | 0%     |
| 148                                                                  | 1    | 19  | 99  | 70  | 52  | 2.66             | 0%                 | 98%    |
| 237                                                                  | 1    | 18  | 78  | 112 | 32  | 2.66             | 0%                 | 90%    |
| 454                                                                  | 1    | 17  | 35  | 65  | 123 | 3.30             | 0%                 | 53%    |
| 319                                                                  | 1    | 17  | 24  | 45  | 154 | 3.62             | 0%                 | 64%    |
| 510                                                                  | 1    | 16  | 27  | 43  | 154 | 3.61             | 0%                 | 31%    |
| 109                                                                  | 1    | 16  | 8   | 34  | 182 | 3.71             | 0%                 | 100%   |
| 77                                                                   | 1    | 15  | 70  | 96  | 59  | 2.85             | 0%                 | 96%    |
| 172                                                                  | 1    | 15  | 60  | 77  | 88  | 3.04             | 0%                 | 93%    |
| 326                                                                  | 1    | 15  | 27  | 44  | 154 | 3.62             | 0%                 | 4%     |
| 450                                                                  | 1    | 14  | 74  | 97  | 55  | 2.82             | 0%                 | 64%    |
| 110                                                                  | 1    | 14  | 39  | 116 | 71  | 3.04             | 0%                 | 95%    |
| 87                                                                   | 1    | 14  | 29  | 45  | 152 | 3.62             | 0%                 | 1%     |
| 305                                                                  | 1    | 14  | 28  | 44  | 154 | 3.63             | 0%                 | 1%     |
| 426                                                                  | 1    | 14  | 27  | 47  | 152 | 3.62             | 0%                 | 0%     |
| 330                                                                  | 1    | 14  | 27  | 45  | 154 | 3.63             | 0%                 | 1%     |
| 329                                                                  | 1    | 14  | 27  | 44  | 155 | 3.64             | 0%                 | 1%     |
| 328                                                                  | 1    | 14  | 27  | 44  | 155 | 3.64             | 0%                 | 1%     |
| 325                                                                  | 1    | 14  | 27  | 44  | 155 | 3.64             | 0%                 | 1%     |
| 155                                                                  | 1    | 14  | 27  | 44  | 155 | 3.64             | 0%                 | 1%     |
| 434                                                                  | 1    | 14  | 27  | 44  | 155 | 3.64             | 0%                 | 1%     |
| 396                                                                  | 1    | 14  | 27  | 44  | 155 | 3.64             | 0%                 | 1%     |
| 147                                                                  | 1    | 13  | 73  | 104 | 50  | 2.82             | 0%                 | 25%    |
| 157                                                                  | 1    | 12  | 60  | 74  | 94  | 3.21             | 0%                 | 26%    |
| 11                                                                   | 1    | 11  | 77  | 96  | 56  | 2.84             | 0%                 | 30%    |
| 419                                                                  | 1    | 11  | 58  | 98  | 73  | 3.00             | 0%                 | 15%    |
| 174                                                                  | 1    | 11  | 44  | 80  | 105 | 3.23             | 0%                 | 18%    |
| 91                                                                   | 1    | 11  | 43  | 105 | 81  | 3.10             | 0%                 | 80%    |
| 79                                                                   | 1    | 11  | 37  | 76  | 116 | 3.42             | 0%                 | 17%    |
| 179                                                                  | 1    | 10  | 51  | 136 | 43  | 2.88             | 0%                 | 39%    |
| 62                                                                   | 1    | 10  | 47  | 79  | 104 | 3.32             | 0%                 | 64%    |
| 69                                                                   | 1    | 9   | 44  | 110 | 77  | 3.08             | 0%                 | 25%    |
| 461                                                                  | 1    | 9   | 33  | 81  | 117 | 3.45             | 0%                 | 3%     |
| 158                                                                  | 1    | 8   | 62  | 120 | 50  | 2.88             | 0%                 | 4%     |
| 428                                                                  | 1    | 8   | 58  | 116 | 58  | 2.96             | 0%                 | 0%     |
| 452                                                                  | 1    | 8   | 55  | 102 | 75  | 3.05             | 0%                 | 0%     |
| 262                                                                  | 1    | 8   | 46  | 91  | 95  | 3.18             | 0%                 | 48%    |

|     |   |   |    |     |     |      |    |     |
|-----|---|---|----|-----|-----|------|----|-----|
| 342 | 1 | 8 | 43 | 95  | 94  | 3.19 | 0% | 14% |
| 516 | 1 | 8 | 40 | 116 | 76  | 3.10 | 0% | 24% |
| 231 | 1 | 8 | 36 | 112 | 84  | 3.17 | 0% | 31% |
| 193 | 1 | 8 | 35 | 88  | 109 | 3.40 | 0% | 0%  |
| 460 | 1 | 8 | 35 | 80  | 117 | 3.45 | 0% | 0%  |
| 198 | 1 | 8 | 34 | 84  | 114 | 3.45 | 0% | 0%  |
| 235 | 1 | 8 | 34 | 81  | 117 | 3.46 | 0% | 0%  |
| 90  | 1 | 8 | 29 | 44  | 159 | 3.74 | 0% | 32% |
| 216 | 1 | 8 | 28 | 82  | 122 | 3.56 | 0% | 29% |
| 146 | 1 | 7 | 77 | 97  | 59  | 2.89 | 0% | 0%  |
| 462 | 1 | 7 | 77 | 97  | 59  | 2.89 | 0% | 0%  |
| 451 | 1 | 7 | 58 | 100 | 75  | 3.04 | 0% | 0%  |
| 432 | 1 | 7 | 57 | 117 | 59  | 2.98 | 0% | 0%  |
| 226 | 1 | 7 | 56 | 102 | 75  | 3.05 | 0% | 0%  |
| 388 | 1 | 7 | 56 | 102 | 75  | 3.05 | 0% | 0%  |
| 1   | 1 | 7 | 47 | 76  | 110 | 3.26 | 0% | 23% |
| 445 | 1 | 7 | 41 | 52  | 140 | 3.55 | 0% | 8%  |
| 421 | 1 | 7 | 38 | 83  | 112 | 3.44 | 0% | 24% |
| 530 | 1 | 7 | 29 | 83  | 121 | 3.56 | 0% | 16% |
| 512 | 1 | 7 | 27 | 124 | 82  | 3.19 | 0% | 8%  |
| 475 | 1 | 7 | 17 | 103 | 113 | 3.4  | 0% | 47% |
| 357 | 1 | 6 | 73 | 93  | 68  | 2.96 | 0% | 0%  |
| 505 | 1 | 6 | 57 | 118 | 59  | 2.99 | 0% | 0%  |
| 392 | 1 | 6 | 56 | 119 | 59  | 2.99 | 0% | 0%  |
| 89  | 1 | 6 | 54 | 82  | 98  | 3.30 | 0% | 0%  |
| 466 | 1 | 6 | 52 | 80  | 102 | 3.33 | 0% | 0%  |
| 457 | 1 | 6 | 50 | 114 | 70  | 3.06 | 0% | 1%  |
| 312 | 1 | 6 | 48 | 99  | 87  | 3.16 | 0% | 0%  |
| 391 | 1 | 6 | 47 | 99  | 88  | 3.17 | 0% | 4%  |
| 447 | 1 | 6 | 40 | 95  | 99  | 3.25 | 0% | 5%  |
| 458 | 1 | 6 | 39 | 128 | 67  | 3.08 | 0% | 0%  |
| 535 | 1 | 6 | 37 | 113 | 84  | 3.17 | 0% | 5%  |
| 188 | 1 | 6 | 32 | 91  | 111 | 3.32 | 0% | 41% |
| 297 | 1 | 6 | 32 | 81  | 121 | 3.55 | 0% | 5%  |
| 337 | 1 | 6 | 30 | 82  | 122 | 3.57 | 0% | 5%  |
| 336 | 1 | 6 | 30 | 82  | 122 | 3.57 | 0% | 6%  |
| 332 | 1 | 6 | 30 | 82  | 122 | 3.57 | 0% | 5%  |
| 7   | 1 | 6 | 30 | 49  | 155 | 3.69 | 0% | 14% |
| 414 | 1 | 6 | 29 | 122 | 83  | 3.2  | 0% | 4%  |
| 80  | 1 | 6 | 29 | 45  | 160 | 3.72 | 0% | 15% |
| 416 | 1 | 6 | 27 | 124 | 83  | 3.20 | 0% | 4%  |
| 415 | 1 | 6 | 27 | 124 | 83  | 3.20 | 0% | 4%  |
| 418 | 1 | 6 | 24 | 127 | 83  | 3.22 | 0% | 5%  |
| 420 | 1 | 6 | 24 | 100 | 110 | 3.36 | 0% | 33% |
| 242 | 1 | 6 | 24 | 66  | 144 | 3.54 | 0% | 18% |
| 243 | 1 | 6 | 17 | 35  | 182 | 3.76 | 0% | 18% |
| 537 | 1 | 5 | 69 | 97  | 69  | 2.99 | 0% | 0%  |
| 225 | 1 | 5 | 56 | 75  | 104 | 3.22 | 0% | 2%  |
| 238 | 1 | 5 | 49 | 81  | 105 | 3.36 | 0% | 0%  |
| 400 | 1 | 5 | 49 | 81  | 105 | 3.36 | 0% | 0%  |
| 364 | 1 | 5 | 48 | 74  | 113 | 3.29 | 0% | 4%  |
| 195 | 1 | 5 | 47 | 102 | 86  | 3.17 | 0% | 0%  |
| 233 | 1 | 5 | 38 | 51  | 146 | 3.67 | 0% | 0%  |
| 469 | 1 | 5 | 36 | 68  | 131 | 3.61 | 0% | 5%  |
| 186 | 1 | 5 | 32 | 105 | 98  | 3.28 | 0% | 1%  |
| 240 | 1 | 5 | 29 | 44  | 162 | 3.79 | 0% | 1%  |
| 509 | 1 | 5 | 27 | 50  | 158 | 3.70 | 0% | 0%  |
| 234 | 1 | 5 | 25 | 118 | 92  | 3.27 | 0% | 0%  |
| 474 | 1 | 5 | 19 | 113 | 103 | 3.35 | 0% | 4%  |
| 14  | 1 | 5 | 18 | 34  | 183 | 3.77 | 0% | 3%  |
| 244 | 1 | 5 | 18 | 33  | 184 | 3.77 | 0% | 4%  |
| 382 | 1 | 5 | 18 | 33  | 184 | 3.77 | 0% | 4%  |
| 386 | 1 | 5 | 17 | 83  | 135 | 3.60 | 0% | 6%  |
| 473 | 1 | 4 | 56 | 89  | 91  | 3.16 | 0% | 0%  |
| 464 | 1 | 4 | 51 | 86  | 99  | 3.33 | 0% | 0%  |
| 163 | 1 | 4 | 49 | 74  | 113 | 3.3  | 0% | 0%  |
| 366 | 1 | 4 | 49 | 74  | 113 | 3.3  | 0% | 0%  |
| 529 | 1 | 4 | 46 | 97  | 93  | 3.21 | 0% | 0%  |
| 453 | 1 | 4 | 44 | 75  | 117 | 3.47 | 0% | 0%  |

|     |   |   |    |     |     |      |    |     |
|-----|---|---|----|-----|-----|------|----|-----|
| 189 | 1 | 4 | 43 | 78  | 115 | 3.46 | 0% | 0%  |
| 448 | 1 | 4 | 41 | 52  | 143 | 3.60 | 0% | 0%  |
| 197 | 1 | 4 | 40 | 99  | 97  | 3.25 | 0% | 0%  |
| 397 | 1 | 4 | 40 | 97  | 99  | 3.27 | 0% | 0%  |
| 378 | 1 | 4 | 40 | 53  | 143 | 3.61 | 0% | 0%  |
| 85  | 1 | 4 | 37 | 123 | 76  | 3.15 | 0% | 0%  |
| 547 | 1 | 4 | 36 | 57  | 143 | 3.64 | 0% | 0%  |
| 6   | 1 | 4 | 34 | 75  | 127 | 3.42 | 0% | 0%  |
| 422 | 1 | 4 | 33 | 53  | 150 | 3.68 | 0% | 0%  |
| 465 | 1 | 4 | 32 | 95  | 109 | 3.35 | 0% | 0%  |
| 45  | 1 | 4 | 32 | 76  | 128 | 3.44 | 0% | 0%  |
| 423 | 1 | 4 | 32 | 55  | 149 | 3.68 | 0% | 0%  |
| 248 | 1 | 4 | 32 | 44  | 160 | 3.72 | 0% | 0%  |
| 467 | 1 | 4 | 31 | 86  | 119 | 3.52 | 0% | 0%  |
| 251 | 1 | 4 | 31 | 45  | 160 | 3.72 | 0% | 0%  |
| 13  | 1 | 4 | 30 | 44  | 162 | 3.80 | 0% | 0%  |
| 538 | 1 | 4 | 30 | 22  | 184 | 4.02 | 0% | 2%  |
| 222 | 1 | 4 | 29 | 49  | 158 | 3.73 | 0% | 11% |
| 536 | 1 | 4 | 28 | 50  | 158 | 3.70 | 0% | 0%  |
| 424 | 1 | 4 | 28 | 23  | 185 | 4.15 | 0% | 6%  |
| 160 | 1 | 4 | 26 | 51  | 159 | 3.71 | 0% | 0%  |
| 224 | 1 | 4 | 25 | 119 | 92  | 3.26 | 0% | 0%  |
| 399 | 1 | 4 | 18 | 58  | 160 | 3.83 | 0% | 0%  |
| 318 | 1 | 4 | 14 | 14  | 208 | 4.04 | 0% | 10% |
| 324 | 1 | 4 | 14 | 12  | 210 | 4.05 | 0% | 9%  |
| 9   | 1 | 4 | 13 | 67  | 156 | 3.79 | 0% | 1%  |
| 455 | 1 | 4 | 13 | 61  | 162 | 3.81 | 0% | 2%  |
| 311 | 1 | 4 | 13 | 14  | 209 | 4.05 | 0% | 10% |
| 181 | 1 | 4 | 13 | 13  | 210 | 4.05 | 0% | 9%  |
| 252 | 1 | 3 | 52 | 65  | 120 | 3.51 | 0% | 0%  |
| 253 | 1 | 3 | 49 | 98  | 90  | 3.19 | 0% | 0%  |
| 16  | 1 | 3 | 36 | 61  | 140 | 3.50 | 0% | 0%  |
| 508 | 1 | 3 | 35 | 85  | 117 | 3.4  | 0% | 0%  |
| 239 | 1 | 3 | 33 | 94  | 110 | 3.36 | 0% | 0%  |
| 5   | 1 | 3 | 33 | 76  | 128 | 3.44 | 0% | 0%  |
| 385 | 1 | 3 | 33 | 75  | 129 | 3.62 | 0% | 0%  |
| 514 | 1 | 3 | 32 | 77  | 128 | 3.62 | 0% | 0%  |
| 228 | 1 | 3 | 31 | 81  | 125 | 3.44 | 0% | 0%  |
| 375 | 1 | 3 | 31 | 49  | 157 | 3.72 | 0% | 0%  |
| 213 | 1 | 3 | 30 | 104 | 103 | 3.30 | 0% | 0%  |
| 365 | 1 | 3 | 30 | 103 | 104 | 3.33 | 0% | 0%  |
| 356 | 1 | 3 | 30 | 48  | 159 | 3.74 | 0% | 0%  |
| 498 | 1 | 3 | 29 | 67  | 141 | 3.54 | 0% | 0%  |
| 67  | 1 | 3 | 29 | 67  | 141 | 3.54 | 0% | 3%  |
| 86  | 1 | 3 | 29 | 24  | 184 | 4.15 | 0% | 0%  |
| 463 | 1 | 3 | 28 | 87  | 122 | 3.55 | 0% | 0%  |
| 446 | 1 | 3 | 27 | 69  | 141 | 3.60 | 0% | 0%  |
| 194 | 1 | 3 | 20 | 35  | 182 | 3.77 | 0% | 0%  |
| 180 | 1 | 3 | 20 | 35  | 182 | 3.77 | 0% | 0%  |
| 207 | 1 | 3 | 20 | 35  | 182 | 3.77 | 0% | 0%  |

|     |   |   |    |     |          |    |    |
|-----|---|---|----|-----|----------|----|----|
| 84  | 1 | 3 | 18 | 118 | 101 3.34 | 0% | 0% |
| 230 | 1 | 3 | 17 | 121 | 99 3.34  | 0% | 0% |
| 76  | 1 | 3 | 17 | 119 | 101 3.35 | 0% | 0% |
| 441 | 1 | 3 | 15 | 58  | 164 3.87 | 0% | 0% |
| 166 | 1 | 3 | 14 | 100 | 123 3.5  | 0% | 0% |
| 250 | 1 | 3 | 13 | 62  | 162 3.82 | 0% | 0% |
| 8   | 1 | 3 | 12 | 32  | 193 4.20 | 0% | 0% |
| 503 | 1 | 2 | 53 | 97  | 88 3.17  | 0% | 0% |
| 427 | 1 | 2 | 47 | 101 | 90 3.21  | 0% | 0% |
| 370 | 1 | 2 | 46 | 69  | 123 3.37 | 0% | 0% |
| 255 | 1 | 2 | 40 | 67  | 131 3.44 | 0% | 0% |
| 61  | 1 | 2 | 40 | 67  | 131 3.44 | 0% | 0% |
| 394 | 1 | 2 | 36 | 84  | 118 3.40 | 0% | 0% |
| 152 | 1 | 2 | 35 | 72  | 131 3.46 | 0% | 0% |
| 187 | 1 | 2 | 29 | 116 | 93 3.27  | 0% | 0% |
| 507 | 1 | 2 | 25 | 84  | 129 3.60 | 0% | 0% |
| 522 | 1 | 2 | 24 | 61  | 153 3.60 | 0% | 0% |
| 241 | 1 | 2 | 23 | 100 | 115 3.42 | 0% | 0% |
| 338 | 1 | 2 | 19 | 106 | 113 3.43 | 0% | 0% |
| 387 | 1 | 2 | 19 | 62  | 157 3.74 | 0% | 0% |
| 519 | 1 | 2 | 18 | 113 | 107 3.38 | 0% | 0% |
| 333 | 1 | 2 | 16 | 106 | 116 3.44 | 0% | 0% |
| 321 | 1 | 2 | 15 | 99  | 124 3.51 | 0% | 0% |
| 528 | 1 | 2 | 15 | 75  | 148 3.65 | 0% | 0% |
| 246 | 1 | 2 | 15 | 14  | 209 4.38 | 0% | 0% |
| 245 | 1 | 2 | 15 | 11  | 212 4.41 | 0% | 0% |
| 533 | 1 | 2 | 14 | 74  | 150 3.66 | 0% | 0% |
| 398 | 1 | 2 | 14 | 67  | 157 3.74 | 0% | 0% |
| 247 | 1 | 2 | 14 | 34  | 190 3.84 | 0% | 0% |
| 129 | 1 | 2 | 13 | 100 | 125 3.69 | 0% | 0% |
| 521 | 1 | 2 | 12 | 72  | 154 3.65 | 0% | 0% |
| 511 | 1 | 2 | 11 | 71  | 156 3.76 | 0% | 0% |
| 18  | 1 | 2 | 10 | 57  | 171 3.87 | 0% | 0% |
| 19  | 1 | 2 | 7  | 54  | 177 3.93 | 0% | 0% |
| 520 | 1 | 2 | 6  | 55  | 177 4.02 | 0% | 0% |
| 313 | 1 | 1 | 37 | 72  | 130 3.45 | 0% | 0% |
| 55  | 1 | 1 | 35 | 73  | 131 3.48 | 0% | 0% |
| 374 | 1 | 1 | 34 | 74  | 131 3.47 | 0% | 0% |
| 320 | 1 | 1 | 31 | 76  | 132 3.66 | 0% | 0% |
| 215 | 1 | 1 | 31 | 67  | 141 3.55 | 0% | 0% |
| 66  | 1 | 1 | 31 | 67  | 141 3.55 | 0% | 0% |
| 506 | 1 | 1 | 24 | 46  | 169 3.83 | 0% | 0% |
| 491 | 1 | 1 | 17 | 78  | 144 3.78 | 0% | 0% |
| 390 | 1 | 1 | 17 | 64  | 158 3.8  | 0% | 0% |
| 431 | 1 | 1 | 17 | 28  | 194 4.33 | 0% | 0% |
| 531 | 1 | 1 | 16 | 79  | 144 3.79 | 0% | 0% |
| 459 | 1 | 1 | 14 | 69  | 156 3.75 | 0% | 0% |
| 468 | 1 | 1 | 14 | 57  | 168 3.92 | 0% | 0% |
| 478 | 1 | 1 | 13 | 38  | 188 4.04 | 0% | 0% |
| 456 | 1 | 1 | 12 | 61  | 166 3.80 | 0% | 0% |
| 379 | 1 | 1 | 11 | 88  | 140 3.62 | 0% | 0% |
| 229 | 1 | 1 | 10 | 84  | 145 3.63 | 0% | 0% |
| 44  | 1 | 1 | 10 | 84  | 145 3.63 | 0% | 0% |
| 298 | 1 | 1 | 10 | 80  | 149 3.83 | 0% | 0% |
| 425 | 1 | 1 | 9  | 42  | 188 4.14 | 0% | 0% |
| 223 | 1 | 1 | 8  | 64  | 167 3.87 | 0% | 0% |
| 182 | 1 | 1 | 7  | 25  | 207 4.42 | 0% | 0% |
| 254 | 1 | 1 | 6  | 46  | 187 4.10 | 0% | 0% |
| 476 | 1 | 1 | 6  | 28  | 205 4.06 | 0% | 0% |
| 10  | 1 | 1 | 3  | 30  | 206 4.18 | 0% | 0% |
| 532 | 1 | 1 | 3  | 15  | 221 4.35 | 0% | 0% |

Group 2: No. Isolates = 167 | No. STs = 167 | Predicted Founder = 108

| ST  | FREQ | SLV | DLV | TLV | SAT | Average Distance | ST Bootstrap |        |
|-----|------|-----|-----|-----|-----|------------------|--------------|--------|
|     |      |     |     |     |     |                  | Group        | Subgrp |
| 108 | 1    | 17  | 12  | 17  | 17  | 120 3.81         | 52%          | 97%    |
| 52  | 1    | 15  | 14  | 17  | 17  | 120 3.83         | 19%          | 91%    |
| 33  | 1    | 14  | 28  | 46  | 46  | 78 3.25          | 14%          | 78%    |
| 35  | 1    | 14  | 27  | 47  | 47  | 78 3.23          | 25%          | 97%    |
| 20  | 1    | 13  | 31  | 38  | 38  | 84 3.39          | 17%          | 91%    |
| 136 | 1    | 12  | 19  | 34  | 34  | 101 3.47         | 5%           | 83%    |
| 135 | 1    | 12  | 15  | 40  | 40  | 99 3.57          | 5%           | 87%    |
| 34  | 1    | 11  | 34  | 49  | 49  | 72 3.19          | 4%           | 75%    |
| 106 | 1    | 11  | 24  | 50  | 50  | 81 3.46          | 3%           | 80%    |
| 276 | 1    | 11  | 14  | 18  | 18  | 123 3.78         | 0%           | 66%    |
| 26  | 1    | 10  | 39  | 38  | 38  | 79 3.35          | 1%           | 41%    |
| 130 | 1    | 10  | 33  | 49  | 49  | 74 3.24          | 1%           | 66%    |
| 281 | 1    | 10  | 30  | 60  | 60  | 66 3.13          | 0%           | 71%    |
| 30  | 1    | 10  | 26  | 46  | 46  | 84 3.34          | 1%           | 80%    |
| 202 | 1    | 10  | 18  | 18  | 18  | 120 3.86         | 0%           | 6%     |
| 354 | 1    | 10  | 18  | 18  | 18  | 120 3.86         | 0%           | 6%     |
| 353 | 1    | 10  | 18  | 18  | 18  | 120 3.86         | 0%           | 5%     |
| 352 | 1    | 10  | 18  | 18  | 18  | 120 3.86         | 0%           | 6%     |
| 346 | 1    | 10  | 18  | 18  | 18  | 120 3.86         | 0%           | 5%     |
| 345 | 1    | 10  | 18  | 18  | 18  | 120 3.86         | 0%           | 5%     |
| 344 | 1    | 10  | 18  | 18  | 18  | 120 3.86         | 0%           | 6%     |
| 343 | 1    | 10  | 18  | 18  | 18  | 120 3.86         | 0%           | 6%     |
| 268 | 1    | 10  | 17  | 27  | 27  | 112 3.68         | 0%           | 38%    |
| 27  | 1    | 10  | 6   | 28  | 28  | 122 3.78         | 0%           | 98%    |
| 266 | 1    | 9   | 38  | 42  | 42  | 77 3.34          | 0%           | 28%    |
| 220 | 1    | 9   | 37  | 42  | 42  | 78 3.25          | 0%           | 35%    |
| 32  | 1    | 9   | 31  | 42  | 42  | 84 3.44          | 0%           | 54%    |
| 37  | 1    | 9   | 30  | 74  | 74  | 53 3.09          | 0%           | 43%    |
| 24  | 1    | 9   | 29  | 43  | 43  | 85 3.46          | 0%           | 33%    |
| 484 | 1    | 9   | 25  | 53  | 53  | 79 3.33          | 0%           | 66%    |
| 100 | 1    | 9   | 18  | 27  | 27  | 112 3.69         | 0%           | 5%     |
| 274 | 1    | 9   | 15  | 18  | 18  | 124 3.81         | 0%           | 5%     |
| 273 | 1    | 9   | 15  | 17  | 17  | 125 3.81         | 0%           | 5%     |
| 404 | 1    | 8   | 38  | 51  | 51  | 69 3.19          | 0%           | 10%    |
| 128 | 1    | 8   | 36  | 53  | 53  | 69 3.18          | 0%           | 9%     |
| 82  | 1    | 8   | 34  | 44  | 44  | 80 3.29          | 0%           | 15%    |
| 402 | 1    | 8   | 28  | 50  | 50  | 80 3.45          | 0%           | 25%    |
| 279 | 1    | 8   | 27  | 52  | 52  | 79 3.43          | 0%           | 32%    |
| 264 | 1    | 8   | 26  | 61  | 61  | 71 3.29          | 0%           | 40%    |
| 265 | 1    | 8   | 25  | 51  | 51  | 82 3.36          | 0%           | 15%    |
| 134 | 1    | 8   | 21  | 47  | 47  | 90 3.57          | 0%           | 22%    |
| 272 | 1    | 8   | 16  | 17  | 17  | 125 3.82         | 0%           | 0%     |
| 269 | 1    | 8   | 16  | 17  | 17  | 125 3.82         | 0%           | 0%     |
| 95  | 1    | 7   | 34  | 76  | 76  | 49 3.07          | 0%           | 10%    |
| 381 | 1    | 7   | 33  | 69  | 69  | 57 3.13          | 0%           | 15%    |
| 540 | 1    | 7   | 31  | 41  | 41  | 87 3.51          | 0%           | 7%     |
| 25  | 1    | 7   | 28  | 56  | 56  | 75 3.30          | 0%           | 7%     |
| 208 | 1    | 7   | 22  | 66  | 66  | 71 3.24          | 0%           | 21%    |
| 22  | 1    | 7   | 20  | 51  | 51  | 88 3.56          | 0%           | 10%    |
| 517 | 1    | 7   | 18  | 11  | 11  | 130 4.04         | 0%           | 40%    |
| 111 | 1    | 6   | 31  | 52  | 52  | 77 3.30          | 0%           | 2%     |
| 477 | 1    | 6   | 30  | 51  | 51  | 79 3.40          | 0%           | 2%     |
| 285 | 1    | 6   | 28  | 53  | 53  | 79 3.35          | 0%           | 59%    |
| 541 | 1    | 6   | 27  | 53  | 53  | 80 3.34          | 0%           | 1%     |
| 105 | 1    | 6   | 26  | 56  | 56  | 78 3.39          | 0%           | 6%     |
| 380 | 1    | 6   | 26  | 46  | 46  | 88 3.56          | 0%           | 3%     |
| 133 | 1    | 6   | 23  | 51  | 51  | 86 3.54          | 0%           | 4%     |
| 94  | 1    | 6   | 22  | 36  | 36  | 102 3.52         | 0%           | 22%    |
| 518 | 1    | 6   | 17  | 10  | 10  | 133 4.15         | 0%           | 9%     |
| 315 | 1    | 6   | 17  | 6   | 6   | 137 4.35         | 0%           | 15%    |
| 28  | 1    | 6   | 12  | 48  | 48  | 100 3.57         | 0%           | 37%    |
| 156 | 1    | 5   | 34  | 80  | 80  | 47 3.03          | 0%           | 0%     |
| 65  | 1    | 5   | 33  | 44  | 44  | 84 3.48          | 0%           | 0%     |
| 93  | 1    | 5   | 31  | 51  | 51  | 79 3.32          | 0%           | 0%     |
| 408 | 1    | 5   | 31  | 51  | 51  | 79 3.32          | 0%           | 0%     |



|     |   |   |    |    |     |      |    |     |
|-----|---|---|----|----|-----|------|----|-----|
| 486 | 1 | 5 | 28 | 63 | 70  | 3.29 | 0% | 0%  |
| 372 | 1 | 5 | 26 | 55 | 80  | 3.48 | 0% | 2%  |
| 211 | 1 | 5 | 23 | 70 | 68  | 3.23 | 0% | 1%  |
| 102 | 1 | 5 | 23 | 54 | 84  | 3.54 | 0% | 2%  |
| 137 | 1 | 5 | 19 | 61 | 81  | 3.45 | 0% | 38% |
| 112 | 1 | 5 | 18 | 27 | 116 | 3.91 | 0% | 9%  |
| 209 | 1 | 5 | 18 | 22 | 121 | 4.01 | 0% | 4%  |
| 101 | 1 | 5 | 17 | 10 | 134 | 4.26 | 0% | 6%  |
| 301 | 1 | 5 | 16 | 24 | 121 | 4.03 | 0% | 7%  |
| 29  | 1 | 5 | 13 | 37 | 111 | 3.68 | 0% | 12% |
| 17  | 1 | 5 | 6  | 34 | 121 | 4.03 | 0% | 24% |
| 545 | 1 | 4 | 32 | 54 | 76  | 3.38 | 0% | 0%  |
| 190 | 1 | 4 | 28 | 52 | 82  | 3.45 | 0% | 1%  |
| 410 | 1 | 4 | 26 | 46 | 90  | 3.57 | 0% | 0%  |
| 291 | 1 | 4 | 25 | 47 | 90  | 3.57 | 0% | 0%  |
| 38  | 1 | 4 | 22 | 60 | 80  | 3.41 | 0% | 0%  |
| 525 | 1 | 4 | 21 | 61 | 80  | 3.42 | 0% | 0%  |
| 270 | 1 | 4 | 20 | 45 | 97  | 3.53 | 0% | 1%  |
| 550 | 1 | 4 | 17 | 51 | 94  | 3.66 | 0% | 0%  |
| 219 | 1 | 4 | 13 | 42 | 107 | 3.72 | 0% | 2%  |
| 287 | 1 | 4 | 11 | 61 | 90  | 3.57 | 0% | 9%  |
| 373 | 1 | 4 | 11 | 28 | 123 | 3.79 | 0% | 1%  |
| 358 | 1 | 4 | 10 | 50 | 102 | 3.63 | 0% | 2%  |
| 278 | 1 | 4 | 9  | 16 | 137 | 3.92 | 0% | 1%  |
| 103 | 1 | 4 | 5  | 32 | 125 | 4.05 | 0% | 54% |
| 277 | 1 | 3 | 29 | 80 | 54  | 3.17 | 0% | 0%  |
| 485 | 1 | 3 | 26 | 49 | 88  | 3.57 | 0% | 0%  |
| 31  | 1 | 3 | 24 | 50 | 89  | 3.46 | 0% | 0%  |
| 258 | 1 | 3 | 22 | 17 | 124 | 3.98 | 0% | 0%  |
| 409 | 1 | 3 | 20 | 56 | 87  | 3.48 | 0% | 0%  |
| 304 | 1 | 3 | 20 | 26 | 117 | 3.93 | 0% | 0%  |
| 367 | 1 | 3 | 19 | 22 | 122 | 3.95 | 0% | 0%  |
| 407 | 1 | 3 | 18 | 54 | 91  | 3.63 | 0% | 0%  |
| 308 | 1 | 3 | 18 | 14 | 131 | 4.16 | 0% | 0%  |
| 351 | 1 | 3 | 17 | 9  | 137 | 4.39 | 0% | 0%  |
| 275 | 1 | 3 | 16 | 28 | 119 | 3.83 | 0% | 0%  |
| 169 | 1 | 3 | 16 | 17 | 130 | 4.13 | 0% | 0%  |
| 348 | 1 | 3 | 16 | 14 | 133 | 4.19 | 0% | 0%  |
| 490 | 1 | 3 | 13 | 49 | 101 | 3.64 | 0% | 0%  |
| 257 | 1 | 3 | 13 | 35 | 115 | 3.98 | 0% | 0%  |
| 355 | 1 | 3 | 13 | 35 | 115 | 4.00 | 0% | 0%  |
| 161 | 1 | 3 | 12 | 37 | 114 | 3.74 | 0% | 5%  |
| 471 | 1 | 3 | 12 | 33 | 118 | 3.83 | 0% | 9%  |
| 412 | 1 | 3 | 11 | 28 | 124 | 3.87 | 0% | 0%  |
| 500 | 1 | 3 | 11 | 27 | 125 | 4.09 | 0% | 0%  |
| 259 | 1 | 3 | 9  | 50 | 104 | 3.64 | 0% | 0%  |
| 435 | 1 | 3 | 9  | 14 | 140 | 4.29 | 0% | 0%  |
| 524 | 1 | 3 | 7  | 58 | 98  | 3.69 | 0% | 0%  |
| 501 | 1 | 3 | 6  | 21 | 136 | 4.21 | 0% | 3%  |
| 317 | 1 | 3 | 5  | 15 | 143 | 4.51 | 0% | 2%  |
| 316 | 1 | 3 | 4  | 18 | 141 | 4.42 | 0% | 2%  |
| 36  | 1 | 2 | 27 | 53 | 84  | 3.43 | 0% | 0%  |
| 413 | 1 | 2 | 21 | 83 | 60  | 3.27 | 0% | 0%  |
| 406 | 1 | 2 | 20 | 62 | 82  | 3.56 | 0% | 0%  |
| 260 | 1 | 2 | 20 | 33 | 111 | 3.86 | 0% | 0%  |
| 309 | 1 | 2 | 20 | 22 | 122 | 3.95 | 0% | 0%  |
| 284 | 1 | 2 | 19 | 70 | 75  | 3.38 | 0% | 0%  |
| 306 | 1 | 2 | 19 | 24 | 121 | 3.91 | 0% | 0%  |
| 54  | 1 | 2 | 19 | 23 | 122 | 3.96 | 0% | 0%  |
| 401 | 1 | 2 | 18 | 32 | 114 | 3.96 | 0% | 0%  |
| 307 | 1 | 2 | 18 | 15 | 131 | 4.10 | 0% | 0%  |
| 539 | 1 | 2 | 17 | 39 | 108 | 3.68 | 0% | 0%  |
| 168 | 1 | 2 | 16 | 56 | 92  | 3.67 | 0% | 0%  |
| 389 | 1 | 2 | 16 | 40 | 108 | 3.74 | 0% | 0%  |
| 481 | 1 | 2 | 16 | 40 | 108 | 3.70 | 0% | 0%  |
| 303 | 1 | 2 | 16 | 17 | 131 | 4.12 | 0% | 0%  |
| 302 | 1 | 2 | 16 | 17 | 131 | 4.12 | 0% | 0%  |
| 350 | 1 | 2 | 16 | 11 | 137 | 4.42 | 0% | 0%  |
| 286 | 1 | 2 | 15 | 58 | 91  | 3.56 | 0% | 0%  |

|     |   |   |    |    |     |      |    |    |
|-----|---|---|----|----|-----|------|----|----|
| 479 | 1 | 2 | 14 | 49 | 101 | 3.69 | 0% | 0% |
| 81  | 1 | 2 | 14 | 35 | 115 | 4.01 | 0% | 0% |
| 282 | 1 | 2 | 13 | 49 | 102 | 3.66 | 0% | 0% |
| 436 | 1 | 2 | 12 | 28 | 124 | 3.87 | 0% | 0% |
| 221 | 1 | 2 | 11 | 36 | 117 | 3.79 | 0% | 0% |
| 527 | 1 | 2 | 11 | 34 | 119 | 4.01 | 0% | 0% |
| 74  | 1 | 2 | 11 | 32 | 121 | 3.75 | 0% | 0% |
| 127 | 1 | 2 | 10 | 34 | 120 | 4.07 | 0% | 0% |
| 395 | 1 | 2 | 9  | 40 | 115 | 3.90 | 0% | 0% |
| 359 | 1 | 2 | 9  | 31 | 124 | 4.09 | 0% | 0% |
| 217 | 1 | 2 | 9  | 9  | 146 | 4.39 | 0% | 0% |
| 292 | 1 | 2 | 8  | 45 | 111 | 3.77 | 0% | 0% |
| 176 | 1 | 2 | 5  | 35 | 124 | 4.06 | 0% | 0% |
| 472 | 1 | 2 | 4  | 26 | 134 | 4.14 | 0% | 0% |
| 534 | 1 | 1 | 23 | 78 | 64  | 3.32 | 0% | 0% |
| 201 | 1 | 1 | 22 | 65 | 78  | 3.40 | 0% | 0% |
| 489 | 1 | 1 | 22 | 52 | 91  | 3.54 | 0% | 0% |
| 290 | 1 | 1 | 20 | 57 | 88  | 3.63 | 0% | 0% |
| 411 | 1 | 1 | 20 | 53 | 92  | 3.65 | 0% | 0% |
| 92  | 1 | 1 | 19 | 67 | 79  | 3.46 | 0% | 0% |
| 322 | 1 | 1 | 17 | 11 | 137 | 4.42 | 0% | 0% |
| 271 | 1 | 1 | 16 | 41 | 108 | 3.76 | 0% | 0% |
| 261 | 1 | 1 | 16 | 37 | 112 | 3.90 | 0% | 0% |
| 15  | 1 | 1 | 14 | 39 | 112 | 3.85 | 0% | 0% |
| 363 | 1 | 1 | 12 | 45 | 108 | 3.95 | 0% | 0% |
| 482 | 1 | 1 | 12 | 31 | 122 | 3.94 | 0% | 0% |
| 256 | 1 | 1 | 10 | 47 | 108 | 3.80 | 0% | 0% |
| 203 | 1 | 1 | 10 | 31 | 124 | 3.95 | 0% | 0% |
| 140 | 1 | 1 | 9  | 37 | 119 | 4.06 | 0% | 0% |
| 288 | 1 | 1 | 7  | 33 | 125 | 3.86 | 0% | 0% |
| 191 | 1 | 1 | 5  | 35 | 125 | 4.18 | 0% | 0% |
| 369 | 1 | 1 | 5  | 23 | 137 | 4.19 | 0% | 0% |
| 218 | 1 | 1 | 3  | 45 | 117 | 3.88 | 0% | 0% |

Group 3: No. Isolates = 21 | No. STs = 21 | Predicted Founder = 97

| ST  | FREQ | SLV | DLV | TLV | SAT | Average Distance | ST Bootstrap Group | Subgrp |
|-----|------|-----|-----|-----|-----|------------------|--------------------|--------|
| 97  |      | 1   | 8   | 6   | 5   | 1 1.95           | 85%                | 97%    |
| 165 |      | 1   | 5   | 11  | 4   | 0 1.95           | 30%                | 64%    |
| 104 |      | 1   | 4   | 10  | 4   | 2 2.2            | 12%                | 29%    |
| 41  |      | 1   | 4   | 9   | 6   | 1 2.2            | 15%                | 31%    |
| 442 |      | 1   | 4   | 6   | 9   | 1 2.35           | 5%                 | 10%    |
| 296 |      | 1   | 3   | 9   | 6   | 2 2.35           | 0%                 | 0%     |
| 494 |      | 1   | 3   | 8   | 8   | 1 2.35           | 0%                 | 0%     |
| 294 |      | 1   | 3   | 8   | 8   | 1 2.35           | 0%                 | 5%     |
| 164 |      | 1   | 3   | 7   | 10  | 0 2.35           | 1%                 | 7%     |
| 443 |      | 1   | 3   | 7   | 9   | 1 2.4            | 0%                 | 0%     |
| 42  |      | 1   | 3   | 6   | 9   | 2 2.5            | 3%                 | 12%    |
| 492 |      | 1   | 2   | 8   | 10  | 0 2.4            | 0%                 | 0%     |
| 548 |      | 1   | 2   | 7   | 8   | 3 2.6            | 0%                 | 0%     |
| 493 |      | 1   | 2   | 3   | 13  | 2 2.75           | 0%                 | 0%     |
| 43  |      | 1   | 2   | 3   | 9   | 6 3.0            | 0%                 | 0%     |
| 295 |      | 1   | 2   | 1   | 13  | 4 2.95           | 0%                 | 0%     |
| 444 |      | 1   | 1   | 8   | 5   | 6 2.85           | 0%                 | 0%     |
| 96  |      | 1   | 1   | 7   | 7   | 5 2.8            | 0%                 | 0%     |
| 200 |      | 1   | 1   | 6   | 10  | 3 2.75           | 0%                 | 0%     |
| 542 |      | 1   | 1   | 4   | 9   | 6 3.1            | 0%                 | 0%     |
| 167 |      | 1   | 1   | 2   | 6   | 11 3.45          | 0%                 | 0%     |

Group 4: No. Isolates = 6 | No. STs = 6 | Predicted Founder = 205

| ST  | FREQ | SLV | DLV | TLV | SAT | Average Distance | ST Bootstrap Group | Subgrp |
|-----|------|-----|-----|-----|-----|------------------|--------------------|--------|
| 205 |      | 1   | 5   | 0   | 0   | 0 1.0            | 98%                | 82%    |
| 175 |      | 1   | 2   | 3   | 0   | 0 1.6            | 0%                 | 0%     |
| 483 |      | 1   | 2   | 3   | 0   | 0 1.6            | 0%                 | 0%     |
| 173 |      | 1   | 1   | 4   | 0   | 0 1.8            | 0%                 | 0%     |
| 204 |      | 1   | 1   | 4   | 0   | 0 1.8            | 0%                 | 0%     |
| 293 |      | 1   | 1   | 4   | 0   | 0 1.8            | 0%                 | 0%     |

Group 5: No. Isolates = 5 | No. STs = 5 | Predicted Founder = Multiple Candidates

| ST  | FREQ | SLV | DLV | TLV | SAT | Average Distance | ST Bootstrap Group | Subgrp |
|-----|------|-----|-----|-----|-----|------------------|--------------------|--------|
| 115 |      | 1   | 3   | 1   | 0   | 0 1.25           | 43%                | 16%    |
| 47  |      | 1   | 3   | 1   | 0   | 0 1.25           | 47%                | 19%    |
| 118 |      | 1   | 2   | 2   | 0   | 0 1.5            | 3%                 | 0%     |
| 116 |      | 1   | 1   | 3   | 0   | 0 1.75           | 0%                 | 0%     |
| 117 |      | 1   | 1   | 3   | 0   | 0 1.75           | 0%                 | 0%     |

Group 6: No. Isolates = 4 | No. STs = 4 | Predicted Founder = 98

| ST  | FREQ | SLV | DLV | TLV | SAT | Average Distance | ST Bootstrap Group | Subgrp |
|-----|------|-----|-----|-----|-----|------------------|--------------------|--------|
| 98  |      | 1   | 3   | 0   | 0   | 0 1.0            | 75%                | 12%    |
| 314 |      | 1   | 1   | 2   | 0   | 0 1.66           | 0%                 | 0%     |
| 99  |      | 1   | 1   | 2   | 0   | 0 1.66           | 0%                 | 0%     |
| 393 |      | 1   | 1   | 2   | 0   | 0 1.66           | 0%                 | 0%     |

Group 7: No. Isolates = 3 | No. STs = 3 | Predicted Founder = 125

| ST  | FREQ | SLV | DLV | TLV | SAT | Average Distance | ST Bootstrap Group | Subgrp |
|-----|------|-----|-----|-----|-----|------------------|--------------------|--------|
| 125 |      | 1   | 2   | 0   | 0   | 0 1.0            | 32%                | 0%     |
| 126 |      | 1   | 1   | 1   | 0   | 0 1.5            | 0%                 | 0%     |
| 120 |      | 1   | 1   | 1   | 0   | 0 1.5            | 0%                 | 0%     |

Group 8: No. Isolates = 3 | No. STs = 3 | Predicted Founder = Multiple Candidates

| ST  | FREQ | SLV | DLV | TLV | SAT | Average Distance | ST Bootstrap Group | Subgrp |
|-----|------|-----|-----|-----|-----|------------------|--------------------|--------|
| 470 |      | 1   | 2   | 0   | 0   | 0 1.0            | 7%                 | 0%     |
| 430 |      | 1   | 2   | 0   | 0   | 0 1.0            | 8%                 | 0%     |
| 429 |      | 1   | 2   | 0   | 0   | 0 1.0            | 14%                | 0%     |

Group 9: No. Isolates = 3 | No. STs = 3 | Predicted Founder = 439

| ST  | FREQ | SLV | DLV | TLV | SAT | Average Distance | ST Bootstrap Group | Subgrp |
|-----|------|-----|-----|-----|-----|------------------|--------------------|--------|
| 439 |      | 1   | 2   | 0   | 0   | 0 1.0            | 31%                | 0%     |
| 440 |      | 1   | 1   | 1   | 0   | 0 1.5            | 0%                 | 0%     |
| 438 |      | 1   | 1   | 1   | 0   | 0 1.5            | 0%                 | 0%     |

Group 10: No. Isolates = 2 | No. STs = 2 | Predicted Founder = None

| ST  | FREQ | SLV | DLV | TLV | SAT | Distance |
|-----|------|-----|-----|-----|-----|----------|
| 144 |      | 1   | 1   | 0   | 0   | 0 1.0    |
| 141 |      | 1   | 1   | 0   | 0   | 0 1.0    |

Group 11: No. Isolates = 2 | No. STs = 2 | Predicted Founder = None

| ST  | FREQ | SLV | DLV | TLV | SAT | Distance |
|-----|------|-----|-----|-----|-----|----------|
| 143 |      | 1   | 1   | 0   | 0   | 0 1.0    |
| 58  |      | 1   | 1   | 0   | 0   | 0 1.0    |

Group 12: No. Isolates = 2 | No. STs = 2 | Predicted Founder = None

| ST  | FREQ | SLV | DLV | TLV | SAT | Distance |
|-----|------|-----|-----|-----|-----|----------|
| 138 |      | 1   | 1   | 0   | 0   | 0 1.0    |
| 40  |      | 1   | 1   | 0   | 0   | 0 1.0    |

Group 13: No. Isolates = 2 | No. STs = 2 | Predicted Founder = None

| ST  | FREQ | SLV | DLV | TLV | SAT | Distance |
|-----|------|-----|-----|-----|-----|----------|
| 488 |      | 1   | 1   | 0   | 0   | 0 1.0    |
| 487 |      | 1   | 1   | 0   | 0   | 0 1.0    |

Group 14: No. Isolates = 2 | No. STs = 2 | Predicted Founder = None

| ST  | FREQ | SLV | DLV | TLV | SAT | Distance |
|-----|------|-----|-----|-----|-----|----------|
| 124 |      | 1   | 1   | 0   | 0   | 0 1.0    |
| 123 |      | 1   | 1   | 0   | 0   | 0 1.0    |

Group 15: No. Isolates = 2 | No. STs = 2 | Predicted Founder = None

| ST  | FREQ | SLV | DLV | TLV | SAT | Distance |
|-----|------|-----|-----|-----|-----|----------|
| 122 |      | 1   | 1   | 0   | 0   | 0 1.0    |
| 119 |      | 1   | 1   | 0   | 0   | 0 1.0    |

Singletons: size 55

|     |     |     |     |
|-----|-----|-----|-----|
| 289 | 549 | 433 | 361 |
| 283 | 546 | 68  | 360 |
| 280 | 544 | 384 | 349 |
| 300 | 543 | 383 | 347 |
| 267 | 142 | 57  | 4   |
| 263 | 499 | 51  | 341 |
| 249 | 495 | 417 | 340 |
| 232 | 526 | 376 | 339 |
| 227 | 523 | 371 | 335 |
| 183 | 480 | 49  | 299 |
| 212 | 502 | 48  |     |
| 178 | 449 | 46  |     |
| 177 | 78  | 405 |     |
| 206 | 75  | 368 |     |
| 159 | 437 | 362 |     |

**Scheme D (Plasmid loci)**

No. isolates = 47 | No. STs = 47 | No. re-samplings for bootstrapping = 1000

No. loci per isolate = 8 | No. identical loci for group def = 7 | No. groups = 6

Group 1: No. Isolates = 12 | No. STs = 12 | Predicted Founder = 2

| ST  | FREQ | SLV | DLV | TLV | SAT | Average  | ST Bootstrap |        |
|-----|------|-----|-----|-----|-----|----------|--------------|--------|
|     |      |     |     |     |     | Distance | Group        | Subgrp |
| 2   |      | 1   | 7   | 2   | 2   | 0 1.54   | 94%          | 96%    |
| 126 |      | 1   | 3   | 8   | 0   | 0 1.72   | 13%          | 25%    |
| 8   |      | 1   | 3   | 4   | 4   | 0 2.09   | 21%          | 10%    |
| 13  |      | 1   | 2   | 6   | 3   | 0 2.09   | 0%           | 0%     |
| 94  |      | 1   | 2   | 6   | 3   | 0 2.09   | 0%           | 0%     |
| 86  |      | 1   | 2   | 5   | 3   | 1 2.27   | 0%           | 0%     |
| 12  |      | 1   | 2   | 5   | 3   | 1 2.27   | 0%           | 0%     |
| 112 |      | 1   | 1   | 7   | 1   | 2 2.36   | 0%           | 0%     |
| 40  |      | 1   | 1   | 6   | 2   | 2 2.45   | 0%           | 0%     |
| 122 |      | 1   | 1   | 3   | 7   | 0 2.54   | 0%           | 0%     |
| 53  |      | 1   | 1   | 2   | 6   | 2 2.81   | 0%           | 0%     |
| 51  |      | 1   | 1   | 2   | 4   | 4 3.0    | 0%           | 0%     |

Group 2: No. Isolates = 9 | No. STs = 9 | Predicted Founder = 9

| ST  | FREQ | SLV | DLV | TLV | SAT | Average  | ST Bootstrap |        |
|-----|------|-----|-----|-----|-----|----------|--------------|--------|
|     |      |     |     |     |     | Distance | Group        | Subgrp |
| 9   |      | 1   | 8   | 0   | 0   | 0 1.0    | 99%          | 99%    |
| 135 |      | 1   | 3   | 5   | 0   | 0 1.62   | 4%           | 0%     |
| 102 |      | 1   | 3   | 5   | 0   | 0 1.62   | 4%           | 0%     |
| 73  |      | 1   | 3   | 5   | 0   | 0 1.62   | 8%           | 0%     |
| 6   |      | 1   | 2   | 6   | 0   | 0 1.75   | 0%           | 0%     |
| 41  |      | 1   | 2   | 6   | 0   | 0 1.75   | 0%           | 0%     |
| 138 |      | 1   | 1   | 7   | 0   | 0 1.87   | 0%           | 0%     |
| 136 |      | 1   | 1   | 7   | 0   | 0 1.87   | 0%           | 0%     |
| 113 |      | 1   | 1   | 7   | 0   | 0 1.87   | 0%           | 0%     |

Group 3: No. Isolates = 4 | No. STs = 4 | Predicted Founder = 4

| ST  | FREQ | SLV | DLV | TLV | SAT | Average  | ST Bootstrap |        |
|-----|------|-----|-----|-----|-----|----------|--------------|--------|
|     |      |     |     |     |     | Distance | Group        | Subgrp |
| 4   |      | 1   | 3   | 0   | 0   | 0 1.0    | 77%          | 14%    |
| 100 |      | 1   | 1   | 2   | 0   | 0 1.66   | 0%           | 0%     |
| 1   |      | 1   | 1   | 2   | 0   | 0 1.66   | 0%           | 0%     |
| 36  |      | 1   | 1   | 2   | 0   | 0 1.66   | 0%           | 0%     |

Group 4: No. Isolates = 4 | No. STs = 4 | Predicted Founder = 68

| ST  | FREQ | SLV | DLV | TLV | SAT | Average  | ST Bootstrap |        |
|-----|------|-----|-----|-----|-----|----------|--------------|--------|
|     |      |     |     |     |     | Distance | Group        | Subgrp |
| 68  |      | 1   | 3   | 0   | 0   | 0 1.0    | 72%          | 12%    |
| 76  |      | 1   | 1   | 2   | 0   | 0 1.66   | 0%           | 0%     |
| 69  |      | 1   | 1   | 2   | 0   | 0 1.66   | 0%           | 0%     |
| 143 |      | 1   | 1   | 2   | 0   | 0 1.66   | 0%           | 0%     |

Group 5: No. Isolates = 3 | No. STs = 3 | Predicted Founder = 21

| ST | FREQ | SLV | DLV | TLV | SAT | Average Distance | ST Bootstrap Group | Subgrp |
|----|------|-----|-----|-----|-----|------------------|--------------------|--------|
| 21 |      | 1   | 2   | 0   | 0   | 0 1.0            | 32%                | 0%     |
| 3  |      | 1   | 1   | 1   | 0   | 0 1.5            | 0%                 | 0%     |
| 31 |      | 1   | 1   | 1   | 0   | 0 1.5            | 0%                 | 0%     |

Group 6: No. Isolates = 3 | No. STs = 3 | Predicted Founder = 117

| ST  | FREQ | SLV | DLV | TLV | SAT | Average Distance | ST Bootstrap Group | Subgrp |
|-----|------|-----|-----|-----|-----|------------------|--------------------|--------|
| 117 |      | 1   | 2   | 0   | 0   | 0 1.0            | 28%                | 0%     |
| 80  |      | 1   | 1   | 1   | 0   | 0 1.5            | 0%                 | 0%     |
| 140 |      | 1   | 1   | 1   | 0   | 0 1.5            | 0%                 | 0%     |

Singletons: size 12

- 103
- 132
- 19
- 16
- 121
- 74
- 70
- 148
- 38
- 33
- 62
- 90

Scheme A

ST144-CVNV  
ST143-CVNV

ST147-CVNV  
ST14-CVNV  
ST132-CVNV  
ST12-CV2NV  
ST133-CVNV  
ST101-CVNV  
ST6-CV2NV  
ST117-CVNV  
ST119-CVNV  
ST137-CVNV  
ST42-CVNV  
ST145-CVNV  
ST96-CVNV  
ST10-CV2  
ST5-CV2 ST44-CV3NV  
ST131-CVNV  
ST102-CVNV  
ST15-CVNV  
ST105-CVNV  
ST103-CVNV  
ST9-CV2NV  
ST95-CV2NV  
ST92-CVNV  
ST13-CV2NV  
ST39-CVNV  
ST7-CV2  
ST140-CVNV  
ST111-CVNV  
ST99-CVNV  
ST109-CVNV  
ST115-CVNV  
ST97-CVNV  
ST107-CVNV  
ST114-CVNV  
ST113-CVNV  
ST120-CVNV  
ST98-CVNV  
ST114-CVNV  
ST110-CVNV  
ST138-CVNV  
ST2-CVNV  
ST93-CVNV  
ST1-CV1  
ST91-CVNV  
ST139-CVNV  
ST125-CVNV  
ST136-CVNV  
ST106-CVNV  
ST135-CVNV  
ST121-CVNV  
ST122-CVNV  
ST104-CVNV  
ST45-CV1NV  
ST118-CVNV  
ST141-CVNV  
ST123-CVNV  
ST128-CVNV  
ST142-CVNV

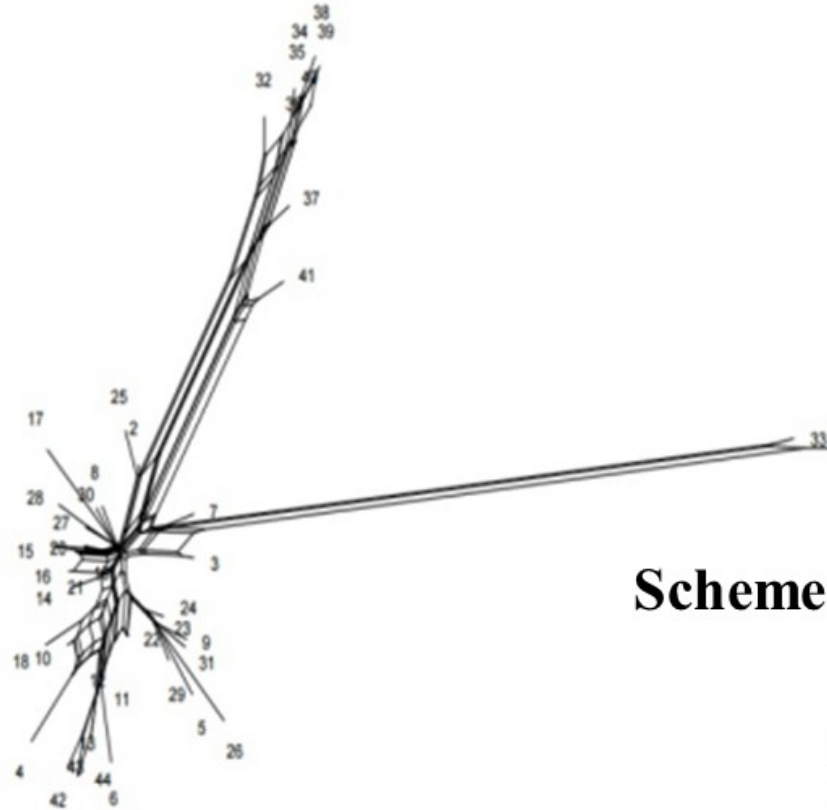

Scheme D

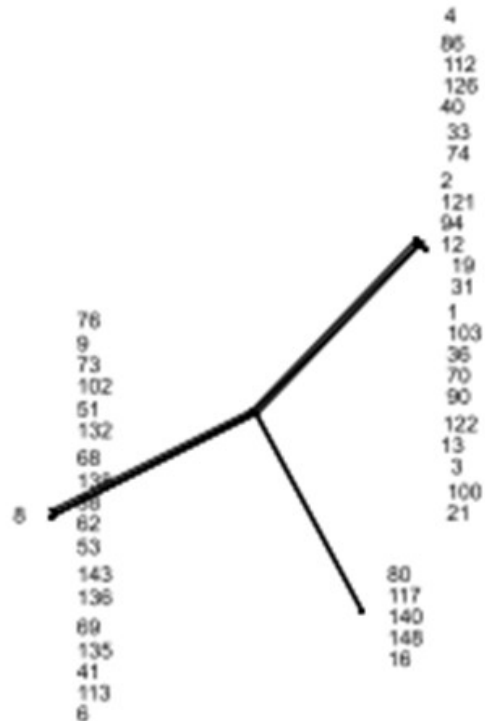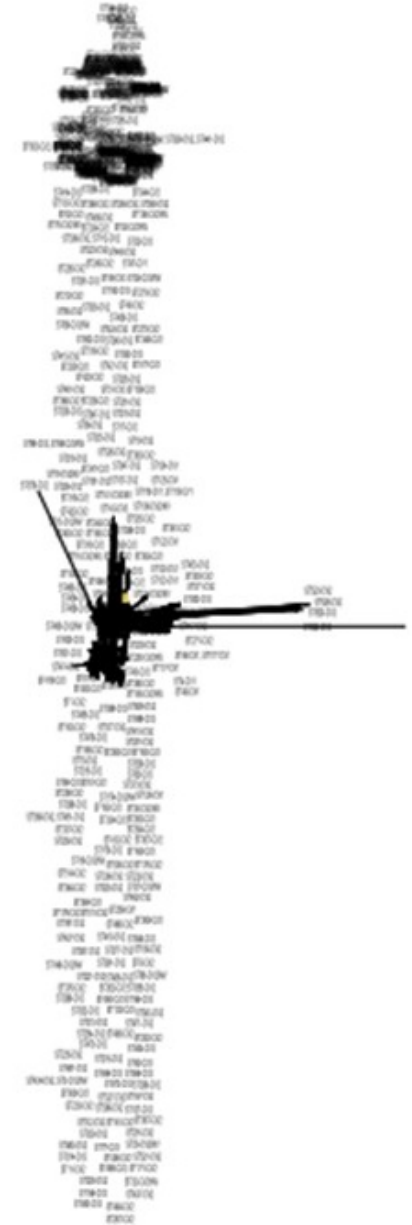

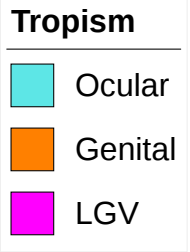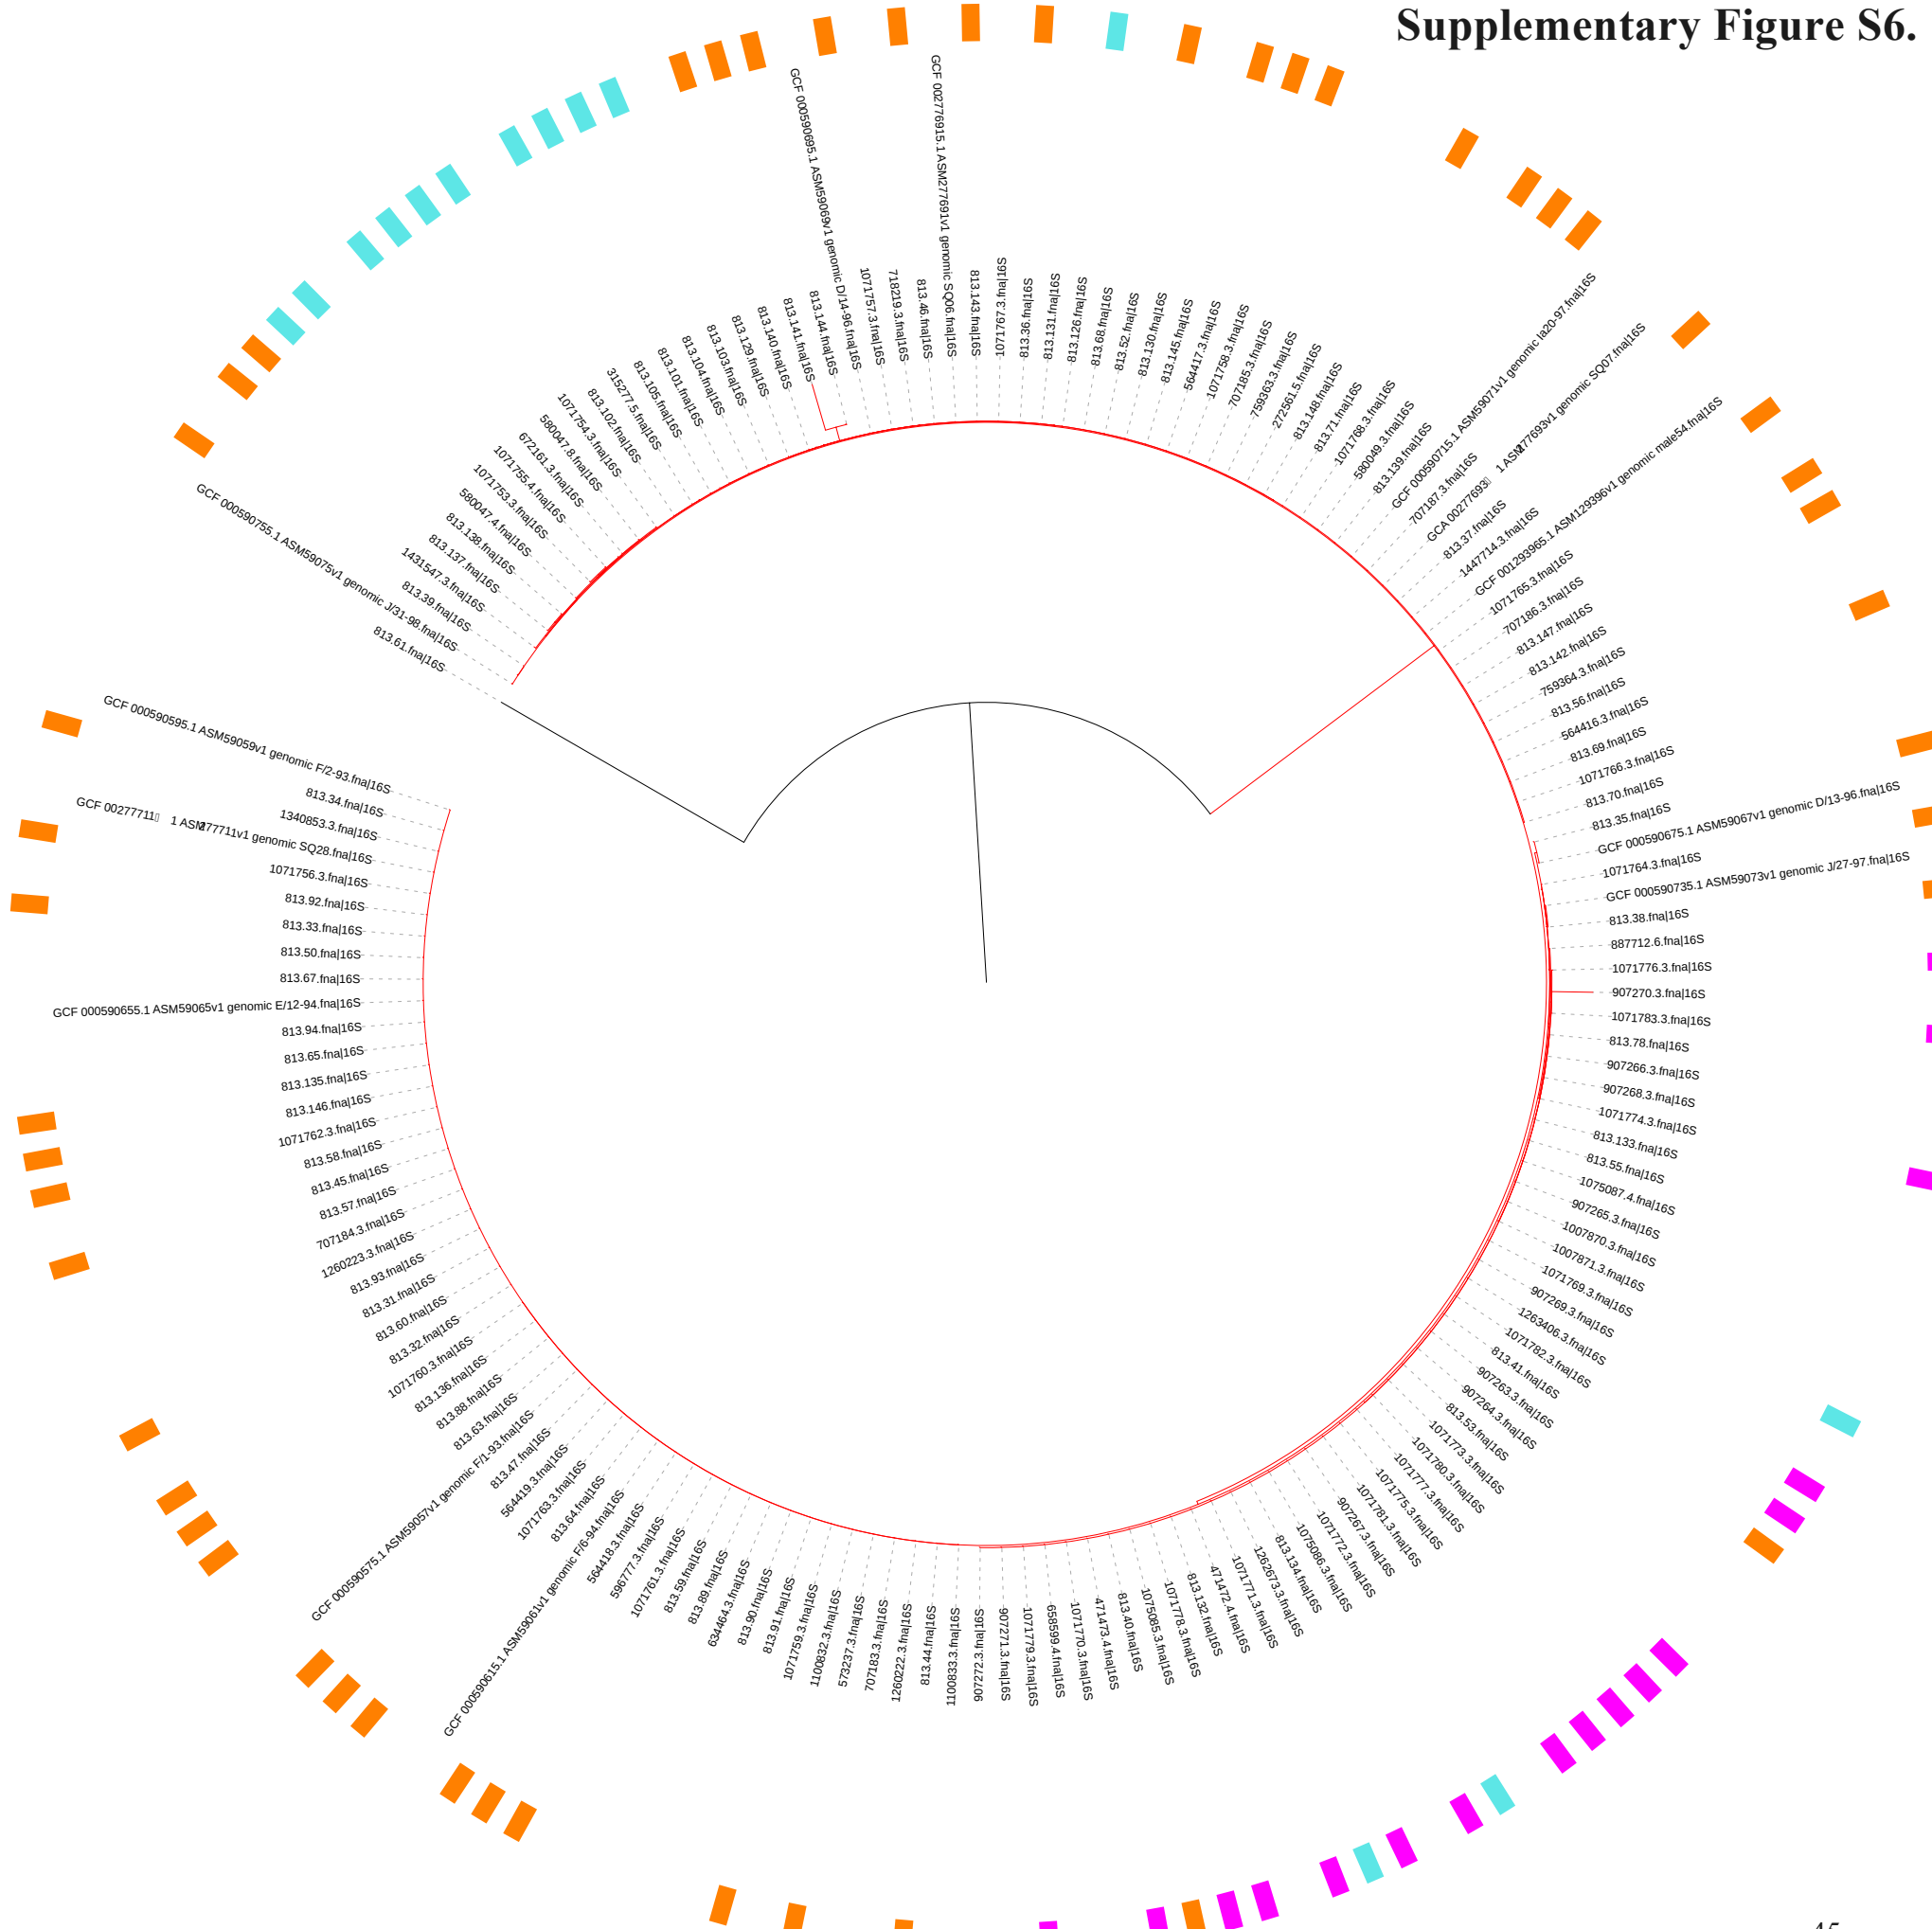



## Supplementary Table S6.

| Number of Loci | Maximum number of STs | Number of combinations analyzed | Molecular Marker (s)                                                                                                                                                                                                                                                                                                                                                                                                                                                                                                                                                                                                                                                                                                                                                                                                                                                                                                                                                                                                                                                                                                                                |
|----------------|-----------------------|---------------------------------|-----------------------------------------------------------------------------------------------------------------------------------------------------------------------------------------------------------------------------------------------------------------------------------------------------------------------------------------------------------------------------------------------------------------------------------------------------------------------------------------------------------------------------------------------------------------------------------------------------------------------------------------------------------------------------------------------------------------------------------------------------------------------------------------------------------------------------------------------------------------------------------------------------------------------------------------------------------------------------------------------------------------------------------------------------------------------------------------------------------------------------------------------------|
| 1              | 21                    | 19                              | 1-hctB                                                                                                                                                                                                                                                                                                                                                                                                                                                                                                                                                                                                                                                                                                                                                                                                                                                                                                                                                                                                                                                                                                                                              |
| 2              | 39                    | 171                             | 1-gidA, -hctB                                                                                                                                                                                                                                                                                                                                                                                                                                                                                                                                                                                                                                                                                                                                                                                                                                                                                                                                                                                                                                                                                                                                       |
| 3              | 56                    | 969                             | 1-gidA, -hctB, -pbpB                                                                                                                                                                                                                                                                                                                                                                                                                                                                                                                                                                                                                                                                                                                                                                                                                                                                                                                                                                                                                                                                                                                                |
| 4              | 64                    | 3876                            | 1-gidA, -leuS, -hctB, -pbpB                                                                                                                                                                                                                                                                                                                                                                                                                                                                                                                                                                                                                                                                                                                                                                                                                                                                                                                                                                                                                                                                                                                         |
| 5              | 69                    | 11628                           | 1-gidA, -lysS, -CT058, -CT172, -hctB<br>2-gidA, -leuS, -CT058, -CT172, -hctB<br>3-gidA, -leuS, -CT058, -hctB, -pbpB<br>4-gidA, -leuS, -CT172, -hctB, -pbpB                                                                                                                                                                                                                                                                                                                                                                                                                                                                                                                                                                                                                                                                                                                                                                                                                                                                                                                                                                                          |
| 6              | 72                    | 27132                           | 1-gidA, -mdhc, -lysS, -CT058, -CT172, -hctB<br>2-gidA, -mdhc, -lysS, -CT058, -hctB, -pbpB<br>3-gidA, -pykF, -lysS, -CT058, -CT172, -hctB<br>4-gidA, -lysS, -leuS, -CT058, -CT172, -hctB<br>5-gidA, -leuS, -CT058, -CT172, -hctB, -pbpB                                                                                                                                                                                                                                                                                                                                                                                                                                                                                                                                                                                                                                                                                                                                                                                                                                                                                                              |
| 7              | 74                    | 50388                           | 1-gidA, -mdhc, -lysS, -CT058, -CT172, -hctB, -pbpB<br>2-gidA, -pykF, -lysS, -CT058, -CT172, -hctB, -pbpB<br>3-gidA, -pykF, -leuS, -CT058, -CT172, -hctB, -pbpB<br>4-gidA, -lysS, -leuS, -CT058, -CT172, -hctB, -pbpB,                                                                                                                                                                                                                                                                                                                                                                                                                                                                                                                                                                                                                                                                                                                                                                                                                                                                                                                               |
| 8              | 75                    | 75582                           | 1-hflX, -gidA, -mdhc, -lysS, -CT058, -CT172, -hctB, -pbpB<br>2-hflX, -gidA, -pykF, -lysS, -CT058, -CT172, -hctB, -pbpB<br>3-hflX, -gidA, -pykF, -leuS, -CT058, -CT172, -hctB, -pbpB,<br>4-hflX, -gidA, -lysS, -leuS, -CT058, -CT172, -hctB, -pbpB<br>5-gidA, -hemN, -mdhc, -lysS, -CT058, -CT172, -hctB, -pbpB<br>6-gidA, -hemN, -pykF, -lysS, -CT058, -CT172, -hctB, -pbpB<br>7-gidA, -hemN, -pykF, -leuS, -CT058, -CT172, -hctB, -pbpB<br>8-gidA, -hemN, -lysS, -leuS, -CT058, -CT172, -hctB, -pbpB<br>9-gidA, -fumC, -mdhc, -lysS, -CT058, -CT172, -hctB, -pbpB<br>10-gidA, -fumC, -pykF, -lysS, -CT058, -CT172, -hctB, -pbpB<br>11-gidA, -fumC, -pykF, -leuS, -CT058, -CT172, -hctB, -pbpB<br>12-gidA, -fumC, -lysS, -leuS, -CT058, -CT172, -hctB, -pbpB<br>13-gidA, -mdhc, pykF, -lysS, -CT058, -CT172, -hctB, -pbpB<br>14-gidA, -mdhc, -lysS, -CT058, -CT144, -CT172, -hctB, -pbpB<br>15-gidA, -pykF, -lysS, -leuS, -CT058, -CT172, -hctB, -pbpB<br>16-gidA, -pykF, -lysS, -CT058, -CT144, -CT172, -hctB, -pbpB<br>17-gidA, -pykF, -leuS, -CT058, -CT144, -CT172, -hctB, -pbpB<br>18-gidA, -lysS, -leuS, -CT058, -CT144, -CT172, -hctB, -pbpB |
